# Supplementary material for: Combining parenthood with a medical career: questionnaire survey of the UK medical graduates of 2002 covering some influences and experiences
Source: PubMed Central journal article supplement — BMJ Open. 2017 Aug 23;7(8):e016822. doi: 10.1136/bmjopen-2017-016822 (PMC5629622; doi:10.1136/bmjopen-2017-016822), 2017-08-23
Supplement: bmjopen-2017-016822.draft_revisions.pdf [file bmjopen-2017-016822.draft_revisions.pdf]

# BMJ Open

BMJ Open is committed to open peer review. As part of this commitment we make the peer review history of every article we publish publicly available.

When an article is published we post the peer reviewers' comments and the authors' responses online. We also post the versions of the paper that were used during peer review. These are the versions that the peer review comments apply to.

The versions of the paper that follow are the versions that were submitted during the peer review process. They are not the versions of record or the final published versions. They should not be cited or distributed as the published version of this manuscript.

BMJ Open is an open access journal and the full, final, typeset and author-corrected version of record of the manuscript is available on our site with no access controls, subscription charges or pay-per-view fees (<http://bmjopen.bmj.com>).

If you have any questions on BMJ Open's open peer review process please email [editorial.bmjopen@bmj.com](mailto:editorial.bmjopen@bmj.com)

# BMJ Open

## Some effects of having a family on medical careers: views of the UK medical graduates of 2002 surveyed in 2014

|                                 |                                                                                                                                                                                                                                                    |
|---------------------------------|----------------------------------------------------------------------------------------------------------------------------------------------------------------------------------------------------------------------------------------------------|
| Journal:                        | <i>BMJ Open</i>                                                                                                                                                                                                                                    |
| Manuscript ID                   | bmjopen-2017-016822                                                                                                                                                                                                                                |
| Article Type:                   | Research                                                                                                                                                                                                                                           |
| Date Submitted by the Author:   | 13-Mar-2017                                                                                                                                                                                                                                        |
| Complete List of Authors:       | Lambert, Trevor; University of Oxford, Nuffield Department of Population Health<br>Smith, Fay; University of Oxford, Nuffield Department of Population Health<br>Goldacre, Michael; University of Oxford, Nuffield Department of Population Health |
| <b>Primary Subject Heading</b>: | Medical education and training                                                                                                                                                                                                                     |
| Secondary Subject Heading:      | Health services research, Health policy                                                                                                                                                                                                            |
| Keywords:                       | MEDICAL EDUCATION & TRAINING, HEALTH SERVICES ADMINISTRATION & MANAGEMENT, Health policy < HEALTH SERVICES ADMINISTRATION & MANAGEMENT                                                                                                             |
|                                 |                                                                                                                                                                                                                                                    |

SCHOLARONE™  
Manuscripts

1 **Some effects of having a family on medical careers: views of the UK medical**  
2 **graduates of 2002 surveyed in 2014**

3  
4 **Short title: Some effects of having a family on medical careers**

5  
6 Trevor W Lambert MSc<sup>1</sup>, Fay Smith PhD<sup>1</sup>, Michael J Goldacre FFPH<sup>1</sup>

7  
8 <sup>1</sup>UK Medical Careers Research Group, Unit of Health-Care Epidemiology, Nuffield  
9 Department of Population Health, University of Oxford, Old Road Campus, Oxford  
10 OX3 7LF

11  
12 Corresponding author:

13 Trevor Lambert ([trevor.lambert@dph.ox.ac.uk](mailto:trevor.lambert@dph.ox.ac.uk); Telephone: 01865 289389)

14  
15 Other email addresses:

16 Fay Smith: [fay.smith@dph.ox.ac.uk](mailto:fay.smith@dph.ox.ac.uk)

17 Michael J Goldacre: [michael.goldacre@dph.ox.ac.uk](mailto:michael.goldacre@dph.ox.ac.uk)

18  
19 **Word count:** [3157 words]

27 **ABSTRACT**

28

29 **Objectives:** To report the self-assessed views of a cohort of medical graduates about the  
30 impact of having (or wanting to have) children on their specialty choice; and the extent to  
31 which their employer was supportive of doctors with children.

32 **Setting:** United Kingdom (UK).

33 **Participants:** UK medical graduates of 2002 surveyed by post and email in 2014.

34 **Results:** The response rate was 64.2% (2057/3205). Most respondents were living with a  
35 spouse or partner (86%) and, of these, 49% had a medical spouse. Having children, or  
36 wanting to have children, had influenced specialty choice for 47% of respondents; for 56% of  
37 doctors with children and 29% of doctors without children; for 59% of women and 28% of  
38 men; and for 78% of general practitioners compared with 27% of hospital doctors and 18%  
39 of surgeons. 42% of respondents regarded the NHS as a family-friendly employer, and 64%  
40 regarded their specialty as family-friendly. More general practitioners (78%) than doctors in  
41 hospital specialties (56%) regarded their specialty as family-friendly, whilst only 32% of  
42 surgeons did so.

43 Of those who had taken maternity/paternity/adoption leave, 49% rated the levels of support  
44 they had received in doing so as *excellent/good*, 32% said it was *acceptable* and 18% said  
45 the support had been *poor/very poor*.

46 **Conclusions:** Having children is a major influence when considering specialty choice for  
47 many doctors, especially women and general practitioners. Surgeons are least influenced in  
48 their career choice by the prospect of parenthood. Almost half of doctors in hospital  
49 specialties regard their specialty as family-friendly.

50

51 [250 words]

52

53

54

55

56

57

58

59

60

1  
2  
3  
4  
5  
6  
7  
8  
9  
10  
11  
12  
13  
14  
15  
16  
17  
18  
19  
20  
21  
22  
23  
24  
25  
26  
27  
28  
29  
30  
31  
32  
33  
34  
35  
36  
37  
38  
39  
40  
41  
42  
43  
44  
45  
46  
47  
48  
49  
50  
51  
52  
53  
54  
55  
56  
57  
58  
59  
60  
61  
62  
63  
64

**Strengths and limitations**

- This was a national study, with a good level of response, of doctors who graduated from UK medical schools in 2002.
- The doctors were surveyed in their mid-thirties, 12 years after they had graduated – a time by which about two thirds of doctors have children.
- The response rate was high for a self-completed survey.
- However, some level of non-responder bias is, as with all surveys, a possibility.

**Keywords:** Physicians, junior; workforce; medical; family relations, quality of life.

**65 BACKGROUND**

66 Many factors may affect doctors' work-life balance. These include factors related to their  
67 work, such as their stage of training, specialty, seniority and working pattern; and personal  
68 factors including whether or not the doctor has children, whether they live with a spouse or  
69 partner, and their gender. Longer work hours are associated with a higher possibility of work-  
70 home 'conflict', which in turn is associated, research suggests, with increased likelihood of  
71 burnout. (Dyrbye, Sotile et al. 2013) Women doctors in the United States were found to have  
72 a higher divorce rate than men doctors: greater work hours among women were associated  
73 with increased divorce prevalence, but not among men. (Ly, Seabury et al. 2015) A Swiss  
74 study found that women doctors, especially those with children, have lower rates of  
75 employment and lower levels of career success than male doctors; the women doctors in the  
76 study showed higher levels of life satisfaction – regardless of parenthood status.(Buddeberg-  
77 Fischer, Stamm et al. 2010)

78  
79 In the United Kingdom (UK), domestic circumstances and working hours were of more  
80 importance to women doctors than to men doctors when choosing a career specialty.(Smith,  
81 Lambert et al. 2015) There are clear differences in specialty choice between men and  
82 women, with surgery being chosen by a predominance of men, and general practice,  
83 paediatrics, and obstetrics and gynaecology being chosen by a predominance of  
84 women.(Lambert, Goldacre et al. 2006; Svirko, Goldacre et al. 2013) A UK study found that  
85 only 40% of female doctors report taking on roles in addition to their clinical work, compared  
86 with 87% of male doctors. (Academy of Medical Royal Colleges 2013) Female GPs,  
87 especially those with children, have been found to be less involved in education, training,  
88 primary care trusts (management organisations covering general/family practice), and  
89 hospital service delivery than male GPs.(Wedderburn, Scallan et al. 2013)

90  
91 We undertook a multi-purpose survey of all UK-trained doctors who graduated in 2002,  
92 twelve years after qualification in 2014. The aim of this paper is to report on the self-

1 93 assessed views of these doctors about the impact of having (or wanting to have) children on  
2  
3 94 their specialty choice; and the extent to which their employer was supportive of doctors with  
4  
5 95 children. We also report on doctors' views about how family-friendly they felt the National  
6  
7 96 Health Service (NHS) was generally for doctors and specifically in their specialty. We  
8  
9 97 compared the replies of men and women, of those with and without children, and of those  
10  
11 98 working in different areas of medicine.  
12

13 99

## 100 **METHODS**

101 The UK Medical Careers Research Group surveyed the UK medical graduates of 2002. We  
102 sent identical web-based and postal questionnaires twelve years after qualification (in 2014).  
103 Up to four reminders were sent to non-respondents. Further details of the methodology are  
104 available elsewhere (Lambert and Goldacre 2013).

105

106 Contact details for doctors were supplied to us by the General Medical Council (GMC) under  
107 a data sharing agreement. The original cohort size of 4436 (2460 women, 1976 men, 55.5%  
108 female) was reduced by 6 deceased doctors (1 man, 5 women), 71 doctors (45 men, 26  
109 women) who asked to be excluded, and 290 doctors (113 men, 177 women) for whom the  
110 GMC could not supply a current address or email. A further 864 doctors (507 men, 357  
111 women) who had not replied to any of our previous surveys of the cohort were excluded from  
112 the study due to a GMC embargo which restricted our survey to previous respondents. This  
113 left a target population for the survey of 3205 (1895 women, 1310 men, 59.1% female).

114

115 The rationale for timing the survey approximately 12 years after graduation was that the  
116 majority of the target population were of peak childbearing age and were likely to be  
117 particularly aware of health service provision with regard to employment and family  
118 formation.

119

1 120 We asked three questions about family formation and children: *'Has the fact of having*  
2  
3 121 *children, or of wanting to have children, influenced your choice of career specialty?'* *'Do you*  
4  
5 122 *regard the NHS as a family-friendly employer for doctors with children?'*, *'Do you regard your*  
6  
7 123 *specialty as a family-friendly specialty for doctors with children?'*. Each of these questions  
8  
9 124 had the options of *Yes, No, Don't know, or Prefer not to answer.*

11 125

13 126 Finally, we asked relevant doctors *'How would you describe the level of support you*  
14  
15 127 *received from employers in helping you to return to work after your most recent period of*  
16  
17 128 *Maternity/Paternity/Adoption leave?'* (with the options of *Excellent, Good, Acceptable, Poor,*  
18  
19 129 *Very poor, Did not return, or Prefer not to answer*). In analysis we combined responses of  
20  
21 130 excellent and good and refer to the combined group as 'excellent/good', and we similarly  
22  
23 131 combined poor and very poor to form 'poor/very poor', thereby reducing the five response  
24  
25 132 categories of assessment to three.

27 133

29 134 The data were initially analysed by univariable crosstabulation. To test statistical significance  
30  
31 135 we used chi-square statistics, Mann-Whitney tests and Kruskal-Wallis tests. Responses of  
32  
33 136 groups of doctors were compared using the following factors: gender; specialty (except  
34  
35 137 where otherwise stated, grouped by us for analysis into four groups: hospital medical  
36  
37 138 specialties, surgical specialties, general practice / family medicine (GP), other hospital-based  
38  
39 139 specialties combined); whether or not the doctor had children; whether or not the doctor had  
40  
41 140 a spouse / partner; and whether or not any spouse / partner was medically qualified. We  
42  
43 141 used multivariable binary logistic regression to assess the joint effect of factors.

45 142

47 143

## 50 144 **RESULTS**

51 145

### 54 146 **Response rate**

55 147



1 148 The response rate from the target population (see Method) was 64.2% (2057/3205). Among  
2  
3 149 women the response rate was 66.0% (1250/1895) and among men it was 61.6% (807/1310).  
4  
5 150 60.8% of respondents were women compared with 55.5% in the original cohort (i.e. prior to  
6  
7 151 the exclusions).  
8

9 152

### 11 153 **Overview of the sample**

13 154

15 155 Of the 2057 respondents, 91.4% (N=1880) told us they were working in medicine in the UK,  
16  
17 156 5.4% (111) were working in medicine outside the UK, and the remainder were in  
18  
19 157 employment outside medicine (1.3%, 26), not in paid employment (1.4%, 28), or did not give  
20  
21 158 employment details (0.6%, 12).  
22

23 159

25 160 We focused on the 1880 in UK medical employment. Of these, 60.5% were female, and  
26  
27 161 39.5% male. The median age of the respondents was 35.4 years. Most respondents were  
28  
29 162 living with a spouse or partner (86.0%). Of those living with a spouse, 49.2% had a medical  
30  
31 163 spouse. Women were more likely than men to have no spouse or partner (15.9% of women  
32  
33 164 compared with 11.1% of men). Men were more likely to have a medically qualified spouse or  
34  
35 165 partner (53.0% of men compared with 46.6% of women).  
36

37 166

39 167 Of 1763 doctors who told us how many children aged under 16 years were resident in their  
40  
41 168 household, 32.7% answered none, 22.6% had one, 35.2% had two, and 9.5% had more  
42  
43 169 than two. The average age of the eldest child was 3.7 years (SD=2.7).  
44

45 170

47 171 75.3% of respondents in UK medical employment were working full-time (94.4% of men,  
48  
49 172 62.6% of women). GPs were more likely to be working part-time (42.5%) than doctors  
50  
51 173 working in other specialties (15.1%).  
52

53 174  
54  
55  
56  
57  
58  
59  
60

1 175 **Responses to the question: 'Has the fact of having children, or of wanting to have**  
2  
3 176 **children, influenced your choice of career specialty?'**

4  
5 177 Of all respondents who were working in medicine in the UK and who answered the question  
6  
7 178 (N=1811), 47% answered *yes* and 53% answered *no/don't know*.

8  
9 179

10  
11 180 To examine differences in response by gender, having children, specialty group,  
12  
13 181 partner/spouse status, and working hours, we reduced the working data to the 1716 doctors  
14  
15 182 who had complete data for the five predictors.

16  
17  
18 183 Each of these five predictors showed significant ( $p < 0.001$ ) variation when analysed in  
19  
20 184 isolation (Table 1): 59% of women and 28% of men agreed that consideration of children  
21  
22 185 had influenced their career choice; 56% of doctors with children and 29% of doctors without  
23  
24 186 children agreed; 18% of surgeons, 27% of doctors in the hospital medical specialties, 34% of  
25  
26 187 doctors in other hospital specialties, and 78% of doctors in general practice agreed; 50% of  
27  
28 188 doctors with a medically qualified spouse, 49% of doctors with a non-medical spouse, and  
29  
30 189 30% of doctors with no spouse agreed; and 37% of doctors who worked full time agreed  
31  
32 190 compared with 76% of doctors who worked less than full time.

33  
34  
35 191 A multivariable logistic regression model was fitted, starting with all five predictors in the  
36  
37 192 model. Partner/spouse status was found not to be a significant predictor. The other four  
38  
39 193 predictors were retained. No interaction terms between predictors were found to improve the  
40  
41 194 fit of the model. The significance of specialty group as a predictor was due to the difference  
42  
43 195 between the responses of GPs and radiologists compared with those of other specialty  
44  
45 196 groups. Appendix 1 shows odds ratios and confidence intervals for the multivariable model  
46  
47 197 by specialty group with four significant factors (the specialty, gender, having children, and  
48  
49 198 full- or part-time working).

50  
51  
52 199 Among women with children 91% (300/331) of GPs and 51% (172/336) of hospital doctors  
53  
54 200 agreed that consideration of children had influenced their career choice, while among men  
55  
56 201 with children, 75% (92/122) of GPs and 21% (70/334) of hospital doctors agreed.

1 202 Among women without children, 61% (68/112) of GPs and 28% (69/247) of hospital doctors  
2  
3 203 agreed, while among men without children 40% (19/48) of GPs and 7% (14/186) of hospital  
4  
5 204 doctors agreed.

6  
7  
8 205 Comparison of agreement rates for women hospital doctors with children showed that 43%  
9  
10 206 (84/196) of those working full time agreed that consideration of children had influenced their  
11  
12 207 career choice, compared with 63% (88/140) of those working part-time. Among women GPs  
13  
14 208 with children the equivalent figures for full timers and less than full timers were much closer  
15  
16 209 at 87% (117/135) and 93% (183/196). Numbers of men working less than full time were  
17  
18 210 insufficient (38 in all) for meaningful comparisons with those working full time.

21  
22 211 **Responses to the question: 'Do you regard the NHS as a family-friendly employer for**  
23  
24 212 **doctors with children?'**

25  
26 213 Of all respondents, 42% answered yes, and 58% answered *no/don't know*. To examine  
27  
28 214 differences in response by gender, having children, specialty group, partner/spouse status,  
29  
30 215 and working hours, we reduced the subjects to the 1720 doctors who had complete data for  
31  
32 216 the five predictors.

33  
34  
35 217 Three of these five predictors showed significant ( $p < 0.01$ ) variation when analysed in  
36  
37 218 isolation (Table 2): more doctors with children (47%) than doctors without children (35%)  
38  
39 219 regarded the NHS as a family-friendly employer for doctors with children; 44% of doctors  
40  
41 220 with a medically qualified spouse, 45% of doctors with a non-medical spouse, and 33% of  
42  
43 221 doctors with no spouse agreed; and 41% of doctors who worked full time agreed compared  
44  
45 222 with 49% of doctors who worked less than full time.

46  
47  
48 223 A multivariable logistic regression model was fitted, starting with all three predictors which  
49  
50 224 were significant univariably. Partner/spouse status was found not to be a significant  
51  
52 225 predictor. The other two predictors were retained. The interaction term between the  
53  
54 226 remaining two predictors did not improve the fit of the model. Appendix 1 shows odds ratios

1 227 and confidence intervals for the multivariable model with two significant factors (specialty  
2  
3 228 group, and working hours).

4  
5  
6 229 Among women with children 45% (148/330) of GPs and 56% (189/335) of hospital doctors  
7  
8 230 agreed that the NHS is a family-friendly employer for doctors with children, while among men  
9  
10 231 with children 42% (51/122) of GPs and 40% (135/335) of hospital doctors agreed.

11  
12  
13 232 Among women without children, 30% (34/112) of GPs and 34% (86/250) of hospital doctors  
14  
15 233 agreed, while among men without children 35% (17/49) of GPs and 39% (72/187) of hospital  
16  
17 234 doctors agreed.

18  
19  
20 235 Comparison of agreement rates for women hospital doctors with children showed that 52%  
21  
22 236 (102/196) of those working full time agreed that the NHS is a family-friendly employer for  
23  
24 237 doctors with children, compared with 63% (87/139) of those working part-time. Among  
25  
26 238 women GPs with children the equivalent figures for full timers and less than full timers were  
27  
28 239 closer at 43% (58/135) and 46% (90/195). Numbers of men working less than full time were  
29  
30 240 insufficient (38 in all) for meaningful comparisons with those working full time. Results are  
31  
32 241 shown in Appendix 2 for specialties within our 'other hospital specialties' group, though the  
33  
34 242 percentages are based on small counts and should be interpreted with caution.

35  
36  
37 243 **Responses to the question: 'Do you regard your specialty as a family-friendly**  
38  
39 244 **specialty for doctors with children?'**

40  
41  
42 245 Of all respondents, 64% of doctors answered *yes* and 36% answered *no/don't know*. To  
43  
44 246 examine differences in response by gender, having children, specialty group, partner/spouse  
45  
46 247 status, and working hours, we reduced the working data to the 1720 doctors who had  
47  
48 248 complete data for the five predictors.

49  
50  
51 249 Each of these five predictors showed significant ( $p < 0.001$ ) variation when analysed in  
52  
53 250 isolation (Table 3): 69% of women and 57% of men agreed that their specialty is a family-  
54  
55 251 friendly employer for doctors with children; 68% of doctors with children and 57% of doctors

1 252 without children agreed; 32% of surgeons, 53% of doctors in the hospital medical specialties,  
2  
3 253 88% of psychiatrists, and 78% of doctors in general practice agreed; 63% of doctors with a  
4  
5 254 medically qualified spouse, 69% of doctors with a non-medical spouse, and 55% of doctors  
6  
7 255 with no spouse agreed; and 59% of doctors who worked full time agreed compared with 81%  
8  
9 256 of doctors who worked less than full time.

11 257 A multivariable logistic regression model was fitted, starting with all five predictors in the  
12  
13 258 model. Gender, having children and partner/spouse status were not found to be significant  
14  
15 259 predictors. The other two predictors (specialty group and working hours) were retained. The  
16  
17 260 interaction term between these two predictors did not improve the fit of the model. Doctors  
18  
19 261 from the following specialty groups differed significantly in their responses to this question  
20  
21 262 from doctors in the hospital medical specialties group: those in Surgery were less likely to  
22  
23 263 agree that their specialty was family-friendly, while those in GP, Radiology, Pathology, and  
24  
25 264 Psychiatry were more likely to agree. Appendix 1 shows odds ratios and confidence intervals  
26  
27 265 for the multivariable model with two significant factors (specialty group, and working hours).  
28  
29  
30  
31 266 Results are shown in Appendix 2 for specialties within our 'other hospital specialties' group.  
32  
33

### 34 267 **Level of support received on return to work**

35  
36  
37 268 The doctors were asked '*How would you describe the level of support you received from*  
38  
39 269 *employers in helping you to return to work after your most recent period of*  
40  
41 270 *Maternity/Paternity/Adoption leave?*

42  
43  
44 271 We excluded from analysis 4 doctors who replied that they had not returned after their period  
45  
46 272 of leave: 831 doctors replied to the question. Of those doctors who returned, 49% (410)  
47  
48 273 rated the support as *excellent/good*, 32% said it was *acceptable* and 18% said the support  
49  
50 274 had been *poor/very poor*. We had replies from 215 men and 616 women. More men (58%)  
51  
52 275 than women (46%) rated the level of support as *excellent/good* ( $\chi^2_2=10.7$ ,  $p<0.05$ ).

53  
54  
55  
56 276

1 277 There was no difference between the four specialty groups (grouped as hospital medical  
2  
3 278 specialties, surgical specialties, general practice, and other hospital specialties combined,  
4  
5 279 see Method) in the ratings of level of support, either for all respondents ( $\chi^2_6=2.0$ ,  $p=0.92$ ), or  
6  
7 280 for men ( $p=0.61$ ) or women ( $p=0.27$ ).  
8

9 281

10  
11 282 Doctors living with a spouse/partner were more likely to rate their level of support as  
12  
13 283 *excellent/good* (56% medical spouse, 44% non-medical spouse) than doctors not living with  
14  
15 284 a spouse (19%,  $\chi^2_4=19.7$ ,  $p<0.001$ ). This pattern was observed among women doctors  
16  
17 285 ( $p<0.05$ ) but not men doctors ( $p=0.13$ ).  
18

19 286

20  
21 287 There was no difference in response to this question between those doctors who worked full-  
22  
23 288 time and those who worked part-time ( $\chi^2_2=0.7$ ,  $p=0.696$ ).  
24

25 289

## 26 290 **DISCUSSION**

27 291

### 28 292 **Main findings**

29  
30  
31  
32  
33 293 Almost half of all respondents said that having children, or wanting to have children, had  
34  
35 294 influenced their specialty choice. More doctors with children, more women than men, more  
36  
37 295 doctors who worked less than full time than those who worked full time, and more GPs than  
38  
39 296 hospital doctors agreed with this statement. Although more doctors living with a  
40  
41 297 spouse/partner than those without agreed that having children had influenced their specialty  
42  
43 298 choice, this difference was not significant after adjustment for these other factors. No  
44  
45 299 difference was observed between doctors with a medical spouse and doctors with a non-  
46  
47 300 medical spouse.  
48

49 301

50  
51  
52 302 Two fifths of doctors regarded the NHS as a family-friendly employer for doctors with  
53  
54 303 children and two thirds regarded their specialty as a family-friendly employer for doctors with  
55  
56  
57  
58  
59  
60

1 304 children. More women than men agreed with the latter proposition. Three quarters of GPs  
2  
3 305 regarded their specialty as family-friendly, whilst only a third of surgeons did so.

4  
5 306

6  
7 307 Almost half of doctors said that the levels of support they had received when taking  
8  
9 308 maternity/paternity/adoption leave was *excellent/good*, though one in five said the support  
10  
11 309 had been *poor/very poor*. More men than women doctors rated the level of support as  
12  
13 310 *excellent/good*. Of those doctors living with a spouse, half had a medical spouse. More  
14  
15 311 doctors living with a spouse/partner rated their level of leave support as *excellent/good* than  
16  
17 312 doctors not living with a spouse; and more doctors living with a medical spouse than doctors  
18  
19 313 with a non-medical spouse rated this support as *excellent/good*.

20  
21 314

### 22 23 315 **Strengths and limitations**

24  
25 316 This was a national study, with a good level of response, of doctors who graduated from UK  
26  
27 317 medical schools in 2002. The doctors were surveyed in their mid-thirties, 12 years after they  
28  
29 318 had graduated – a time by which about two thirds of doctors have children.(Goldacre,  
30  
31 319 Davidson et al. 2012) The response rate was high for a self-completed survey. However,  
32  
33 320 some level of non-responder bias is, as with all surveys, a possibility.

34  
35 321

### 36 37 322 **Comparison with existing literature**

38  
39 323 Our respondents told us that considerations of parenthood influenced their specialty choice,  
40  
41 324 and we found that more women than men agreed with this. This is consistent with other  
42  
43 325 research which found that some men doctors tend to consider their own career to be more  
44  
45 326 important than that of their medically qualified spouse.(Stamm and Buddeberg-Fischer 2011)  
46  
47 327 Parenthood status has also been found to affect the career development of doctors, with  
48  
49 328 parents being less likely to hold a senior role than doctors without children.(Stamm and  
50  
51 329 Buddeberg-Fischer 2011) We found that more GPs than hospital doctors say that  
52  
53 330 parenthood influenced their specialty choice. A Swiss study found that more family doctors



1 331 than hospital doctors are married, and more of them have children.(Buddeberg-Fischer,  
2  
3 332 Stamm et al. 2008)

4  
5 333

6  
7 334 We found that surgeons were less likely to agree that their specialty was family-friendly than  
8  
9 335 were doctors who worked in other specialties. In the United States, surgeons have been  
10  
11 336 reported to face major challenges when trying to balance their personal and professional  
12  
13 337 lives.(Dyrbye, Freischlag et al. 2012)

14  
15 338

16  
17 339 Doctors living with a spouse were more positive than doctors without a spouse about support  
18  
19 340 received when taking leave; and of those doctors with a spouse, doctors in dual-doctor  
20  
21 341 relationships were the most positive. There could be financial reasons for this, as one study  
22  
23 342 points out, those in dual-doctor relationships may be able to make lifestyle choices due to  
24  
25 343 their high income.(Woodward 2005) This same study found that having a medically qualified  
26  
27 344 spouse was associated with reduced hours in clinical practice.

28  
29 345

### 30 346 **Implications / conclusions**

31  
32 347 Parenthood is a key influence in GPs' specialty choice. However, doctors in other  
33  
34 348 specialties, especially surgery, are not influenced to the same extent by parenthood  
35  
36 349 considerations when choosing their specialty. Policy-makers should address the fact that  
37  
38 350 only half of doctors working in specialties other than general practice regard their specialty  
39  
40 351 as family-friendly.

41  
42 352

### 43 353 **Declarations**

44  
45 354 Ethical approval: National Research Ethics Service, following referral to the Brighton and  
46  
47 355 Mid-Sussex Research Ethics Committee in its role as a multi-centre research ethics  
48  
49 356 committee (ref 04/Q1907/48 amendment Am02 March 2015).

50  
51 357

52 358 Consent for publication: Not applicable.



1 359

2

3 360 Availability of data and material: It may be possible for the authors to make tabulated data,

4

5 361 produced in the course of this work but not included in the paper, available to interested

6

7 362 readers on request.

8

9 363

10

11 364 Competing interests: All authors have completed the Unified Competing Interest form at

12

13 365 [www.icmje.org/coi\\_disclosure.pdf](http://www.icmje.org/coi_disclosure.pdf) (available on request from the corresponding author) and

14

15 366 all authors want to declare: (1) financial support for the submitted work from the policy

16

17 367 research programme, Department of Health. All authors also declare: (2) no financial

18

19 368 relationships with commercial entities that might have an interest in the submitted work; (3)

20

21 369 no spouses, partners, or children with relationships with commercial entities that might have

22

23 370 an interest in the submitted work; (4) no non-financial interests that may be relevant to the

24

25 371 submitted work.

26

27 372

28

29 373 Funding: This is an independent report commissioned and funded by the Policy Research

30

31 374 Programme in the Department of Health (project number 016/0118). The views expressed

32

33 375 are not necessarily those of the funding body.

34

35 376

36

37 377 Authors' contributions: TL and MJG designed and conducted the survey. FS and TL

38

39 378 designed the analysis. FS performed the analysis and wrote the first draft of the paper. All

40

41 379 authors contributed to further drafts and all approved the final version.

42

43 380

44

45 381 Acknowledgements: We thank Ritva Ellison for data management and Janet Justice and

46

47 382 Alison Stockford for data entry. We are very grateful to all the doctors who participated in the

48

49 383 surveys.

50

51 384

52

53 385 **References**

54

55 386 Academy of Medical Royal Colleges (2013). Results of the Flexibility and Equality Survey: A

56

57 387 report of the Academy Flexible Careers Committee. London.

58

59

60

- 1 388 Buddeberg-Fischer, B., M. Stamm, et al. (2010). "The impact of gender and parenthood on  
2 389 physicians' careers - Professional and personal situation seven years after  
3 390 graduation." BMC Health Services Research **10:40**. DOI: **10.1186/1472-6963-10-40**.
- 4 391 Buddeberg-Fischer, B., M. Stamm, et al. (2008). "The new generation of family physicians -  
5 392 Career motivation, life goals and work-life balance." Swiss Medical Weekly **138**(21-  
6 393 22): 305-312.
- 7 394 Dyrbye, L. N., J. Freischlag, et al. (2012). "Work-Home Conflicts Have a Substantial Impact  
8 395 on Career Decisions That Affect the Adequacy of the Surgical Workforce." Archives  
9 396 of Surgery **147**(10): 933-939.
- 10 397 Dyrbye, L. N., W. Sotile, et al. (2013). "A Survey of U.S. Physicians and Their Partners  
11 398 Regarding the Impact of Work-Home Conflict." Journal of General Internal Medicine:  
12 399 1-7.
- 13 400 Goldacre, M. J., J. M. Davidson, et al. (2012). "Doctors' age at domestic partnership and  
14 401 parenthood: Cohort studies." Journal of the Royal Society of Medicine, Supplement  
15 402 **105**(9): 390-399.
- 16 403 Lambert, T. and M. Goldacre (2013). "Participation in medicine by graduates of medical  
17 404 schools in the United Kingdom up to 25 years post graduation: National cohort  
18 405 surveys." Academic Medicine **88**(5): 699-709.
- 19 406 Lambert, T. W., M. J. Goldacre, et al. (2006). "Career choices of United Kingdom medical  
20 407 graduates of 2002: Questionnaire survey." Medical Education **40**(6): 514-521.
- 21 408 Ly, D. P., S. A. Seabury, et al. (2015). "Divorce among physicians and other healthcare  
22 409 professionals in the United States: Analysis of census survey data." BMJ (Online)  
23 410 **350**.
- 24 411 Smith, F., T. W. Lambert, et al. (2015). "Factors influencing junior doctors' choices of future  
25 412 specialty: trends over time and demographics based on results from UK national  
26 413 surveys." Journal of the Royal Society of Medicine **108**(10): 396-405.
- 27 414 Stamm, M. and B. Buddeberg-Fischer (2011). "How do physicians and their partners  
28 415 coordinate their careers and private lives?" Swiss Medical Weekly **141**(March).
- 29 416 Svirko, E., M. Goldacre, et al. (2013). "Career choices of the United Kingdom medical  
30 417 graduates of 2005, 2008 and 2009: Questionnaire surveys." Medical Teacher **35**(5):  
31 418 365-75.
- 32 419 Wedderburn, C., S. Scallan, et al. (2013). "The views and experiences of female GPs on  
33 420 professional practice and career support." Education for Primary Care **24**(5): 321-  
34 421 329.
- 35 422 Woodward, C. A. (2005). "When a physician marries a physician: Effect of physician-  
36 423 physician marriages on professional activities." Canadian Family Physician  
37 424 **51**(JUNE): 850-851.
- 38 425

**Table 1: Responses to the question ‘Has the fact of having children, or of wanting to have children, influenced your choice of career specialty?’ (numbers and percentages of doctors who replied ‘yes’)**

| Group                        | Men         |         | Women       |          |
|------------------------------|-------------|---------|-------------|----------|
|                              | % agreement | n/N     | % agreement | n/N      |
| All                          | 28.3        | 195/690 | 59.4        | 609/1026 |
| Has child(ren)               |             |         |             |          |
| Yes                          | 35.5        | 162/456 | 70.8        | 472/667  |
| No                           | 14.1        | 33/234  | 38.2        | 137/359  |
| Specialty                    |             |         |             |          |
| Hospital medical specialties | 13.5        | 20/148  | 38.5        | 65/169   |
| Surgery                      | 14.0        | 19/136  | 28.8        | 17/59    |
| GP                           | 65.3        | 111/170 | 83.1        | 368/443  |
| Paediatrics                  | 8.0         | 2/25    | 35.1        | 33/94    |
| Emergency medicine           | 10.3        | 3/29    | 26.1        | 6/23     |
| Obstetrics and gynaecology   | 10.0        | 1/10    | 11.5        | 3/26     |
| Anaesthetics                 | 11.1        | 9/81    | 52.4        | 43/82    |
| Radiology                    | 50.0        | 12/24   | 73.3        | 22/30    |
| Clinical oncology            | 20.0        | 2/10    | 50.0        | 9/18     |
| Pathology                    | 28.6        | 8/28    | 62.9        | 22/35    |
| Psychiatry                   | 27.6        | 8/29    | 44.7        | 21/47    |
| Partner/spouse status        |             |         |             |          |
| Medical spouse               | 27.7        | 89/321  | 68.4        | 273/399  |
| Non-medical spouse           | 32.2        | 94/292  | 59.7        | 276/462  |
| No spouse                    | 15.6        | 12/77   | 36.4        | 60/165   |
| Working hours                |             |         |             |          |
| Full time                    | 26.5        | 173/652 | 47.9        | 301/628  |
| Less than full time          | 57.9        | 22/38   | 77.4        | 308/398  |

Statistical tests on % agreement:

Children ( $\chi^2_1$ ): Men 34.0, Women 101.5

Specialty group ( $\chi^2_{10}$ ): Men 173.6, Women 223.9

Partner/spouse status ( $\chi^2_2$ ): Men 8.4 (p=0.015), Women 49.8

Working hours ( $\chi^2_1$ ): Men 15.9, Women 86.4

All p<0.001 except where indicated.

**Table 2: Responses to the question ‘Do you regard the NHS as a family-friendly employer for doctors with children?’ (numbers and percentages of doctors who replied ‘yes’)**

| Group                        | Men         |         | Women       |          |
|------------------------------|-------------|---------|-------------|----------|
|                              | % agreement | n/N     | % agreement | n/N      |
| All                          | 39.7        | 275/693 | 44.5        | 457/1027 |
| Has child(ren)               |             |         |             |          |
| Yes                          | 40.7        | 186/457 | 50.7        | 337/665  |
| No                           | 37.7        | 89/236  | 33.1        | 120/362  |
| Specialty                    |             |         |             |          |
| Hospital medical specialties | 40.4        | 61/151  | 41.2        | 70/170   |
| Surgery                      | 37.8        | 51/135  | 39.0        | 23/59    |
| General Practice             | 39.8        | 68/171  | 41.2        | 182/442  |
| Paediatrics                  | 32.0        | 8/25    | 46.3        | 44/95    |
| Emergency medicine           | 50.0        | 15/30   | 52.4        | 11/21    |
| Obstetrics and gynaecology   | 10.0        | 1/10    | 48.1        | 13/27    |
| Anaesthetics                 | 43.2        | 35/81   | 48.8        | 40/82    |
| Radiology                    | 47.8        | 11/23   | 56.7        | 17/30    |
| Clinical oncology            | 40.0        | 4/10    | 47.4        | 9/19     |
| Pathology                    | 42.9        | 12/28   | 51.4        | 18/35    |
| Psychiatry                   | 31.0        | 9/29    | 63.8        | 30/47    |
| Partner/spouse status        |             |         |             |          |
| Medical spouse               | 40.2        | 130/323 | 46.1        | 184/399  |
| Non-medical spouse           | 39.9        | 117/293 | 47.5        | 221/465  |
| No spouse                    | 36.4        | 28/77   | 31.9        | 52/163   |
| Working hours                |             |         |             |          |
| Full time                    | 40.0        | 262/655 | 41.0        | 259/631  |
| Less than full time          | 34.2        | 13/38   | 50.0        | 198/396  |

Statistical tests on % agreement:  
 Children ( $\chi^2_1$ ): Men 0.5 (p=0.496), Women 28.4  
 Specialty group ( $\chi^2_{10}$ ): Men 8.0 (p=0.634), Women 14.5 (p=0.150),  
 Partner/spouse status ( $\chi^2_2$ ): Men 0.4 (p=0.817), Women 12.6 (p=0.002)  
 Working hours ( $\chi^2_1$ ): Men 0.3 (p=0.590), Women 7.5 (p=0.006)  
 All p<0.001 except where indicated.

**Table 3: Responses to the question ‘Do you regard your specialty as a family-friendly employer for doctors with children?’ (numbers and percentages of doctors who replied ‘yes’)**

| Group                        | Men         |         | Women       |          |
|------------------------------|-------------|---------|-------------|----------|
|                              | % agreement | n/N     | % agreement | n/N      |
| All                          | 57.0        | 393/690 | 69.1        | 712/1030 |
| Has child(ren)               |             |         |             |          |
| Yes                          | 57.6        | 261/453 | 75.6        | 505/668  |
| No                           | 55.7        | 132/237 | 57.2        | 207/362  |
| Specialty                    |             |         |             |          |
| Hospital medical specialties | 43.0        | 65/151  | 60.9        | 103/169  |
| Surgery                      | 32.6        | 44/135  | 31.7        | 19/60    |
| GP                           | 79.3        | 134/169 | 78.1        | 345/442  |
| Paediatrics                  | 52.0        | 13/25   | 65.3        | 62/95    |
| Emergency medicine           | 26.7        | 8/30    | 39.1        | 9/23     |
| Obstetrics and gynaecology   | 10.0        | 1/10    | 40.7        | 11/27    |
| Anaesthetics                 | 60.0        | 48/80   | 71.1        | 59/83    |
| Radiology                    | 95.7        | 22/23   | 80.0        | 24/30    |
| Clinical oncology            | 80.0        | 8/10    | 63.2        | 12/19    |
| Pathology                    | 89.3        | 25/28   | 74.3        | 26/35    |
| Psychiatry                   | 86.2        | 25/29   | 89.4        | 42/47    |
| Partner/spouse status        |             |         |             |          |
| Medical spouse               | 53.4        | 172/322 | 70.3        | 281/400  |
| Non-medical spouse           | 62.4        | 181/290 | 72.7        | 339/466  |
| No spouse                    | 51.3        | 40/78   | 56.1        | 92/164   |
| Working hours                |             |         |             |          |
| Full time                    | 55.8        | 364/652 | 61.5        | 390/634  |
| Less than full time          | 76.3        | 29/38   | 81.3        | 322/396  |

Statistical tests on % agreement:  
 Children ( $\chi^2_1$ ): Men 0.2 (p=0.687), Women 36.5  
 Specialty group ( $\chi^2_{10}$ ): Men 138.0, Women 93.4  
 Partner/spouse status ( $\chi^2_2$ ): Men 6.2 (p=0.045), Women 16.1  
 Working hours ( $\chi^2_1$ ): Men 5.3 (p=0.021), Women 43.8  
 All p<0.001 except where indicated.

**Appendix 1: Odds ratios and confidence intervals for the multivariable models on effect of having children and on family-friendliness (a, b and c, see footnotes)**

| Group                         | a               |       | b              |       | c               |       |
|-------------------------------|-----------------|-------|----------------|-------|-----------------|-------|
|                               | OR (95% CI)     | p     | OR (95% CI)    | p     | OR (95% CI)     | p     |
| <b>Gender</b>                 |                 |       |                |       |                 |       |
| Male*                         | 1               |       | 1              |       | -               | NS    |
| Female                        | 2.9 (2.2, 3.8)  | <.001 | -              | NS    | -               | NS    |
| <b>Has child(ren)</b>         |                 |       |                |       |                 |       |
| Yes*                          | 1               |       | 1              |       | -               | NS    |
| No                            | 0.3 (0.2, 0.4)  | <.001 | 0.6 (0.5, 0.8) | <.001 | -               | NS    |
| <b>Specialty group</b>        |                 |       |                |       |                 |       |
| Hospital medical specialties* | 1               |       | -              | NS    | 1               |       |
| Surgery                       | 0.9 (0.6, 1.4)  | 0.67  | -              | NS    | 0.5 (0.3, 0.7)  | <.001 |
| GP                            | 8.1 (5.8, 11.5) | <.001 | -              | NS    | 2.8 (2.1, 3.7)  | <.001 |
| Paediatrics                   | 0.8 (0.5, 1.3)  | 0.29  | -              | NS    | 1.4 (0.9, 2.2)  | 0.12  |
| Emergency medicine            | 0.6 (0.3, 1.4)  | 0.23  | -              | NS    | 0.4 (0.2, 0.8)  | 0.01  |
| Obstetrics and gynaecology    | 0.2 (0.1, 0.7)  | 0.01  | -              | NS    | 0.4 (0.2, 0.9)  | 0.02  |
| Anaesthetics                  | 1.5 (0.9, 2.3)  | 0.1   | -              | NS    | 1.8 (1.2, 2.7)  | 0.002 |
| Radiology                     | 5.6 (2.9, 10.8) | <.001 | -              | NS    | 6.4 (2.8, 14.6) | <.001 |
| Clinical oncology             | 2.0 (0.8, 4.6)  | 0.12  | -              | NS    | 2.2 (1, 5)      | 0.06  |
| Pathology                     | 2.6 (1.4, 4.7)  | 0.002 | -              | NS    | 4 (2, 7.7)      | <.001 |
| Psychiatry                    | 1.4 (0.8, 2.5)  | 0.27  | -              | NS    | 6.1 (2.9, 12.8) | <.001 |
| <b>Partner/spouse status</b>  |                 |       |                |       |                 |       |
| Medical spouse*               | -               | NS    | -              | NS    | -               | NS    |
| Non-medical spouse            | -               | NS    | -              | NS    | -               | NS    |
| No spouse                     | -               | NS    | -              | NS    | -               | NS    |
| <b>Working hours</b>          |                 |       |                |       |                 |       |
| Full time*                    | 1               |       | 1              |       | 1               |       |
| Less than full time           | 1.9 (1.4, 2.5)  | <.001 | 1.2 (1.0, 1.6) | <.05  | 2.2 (1.7, 2.9)  | <.001 |

Multivariable model based on numbers of doctors who replied 'yes' to a) Has the fact of having children, or of wanting to have children, influenced your choice of career specialty?; b) Do you regard the NHS as a family-friendly employer for doctors with children?; c) Do you regard your specialty as a family-friendly employer for doctors with children?

\*Reference group for multivariable model.

'Multivariable' denotes binomial logistic regression result for each predictor with all other predictors in the model. We excluded cases where one or more predictors were missing, or where the dependent variable was missing, which reduced the sample size to 1716.

The Odds Ratios (OR) indicate the likelihood that a member of a group would regard the outcome variable as important, compared with a member of the reference group. Thus, for example, compared with a full-time doctor, a part-time doctor was twice as likely to regard children as an important influence on their choice of specialty.

**Appendix 2: Numbers and percentages of respondents answering yes to the questions on family-friendliness<sup>ab</sup>**

| Respondent group          | Total     |           | Have children |           | No children |           |
|---------------------------|-----------|-----------|---------------|-----------|-------------|-----------|
|                           | Male      | Female    | Male          | Female    | Male        | Female    |
| Total <sup>a</sup>        | 39% (283) | 43% (475) | 40% (190)     | 50% (348) | 37% (93)    | 32% (127) |
| Total <sup>b</sup>        | 57% (399) | 69% (724) | 57% (263)     | 76% (509) | 55% (136)   | 57% (215) |
| Medical specialties       | 43% (65)  | 60% (105) | 36% (33)      | 67% (67)  | 52% (32)    | 51% (38)  |
| Surgery                   | 32% (45)  | 32% (20)  | 35% (29)      | 46% (12)  | 29% (16)    | 22% (8)   |
| GP                        | 79% (136) | 78% (351) | 81% (97)      | 82% (271) | 75% (39)    | 67% (80)  |
| Other hospital:           | 63% (153) | 68% (248) | 64% (104)     | 74% (159) | 63% (49)    | 60% (89)  |
| <i>Paediatrics</i>        | 54% (14)  | 66% (63)  | 47% (9)       | 73% (43)  | 71% (5)     | 54% (20)  |
| <i>Emergency medicine</i> | 27% (8)   | 39% (9)   | 25% (5)       | 25% (3)   | 30% (3)     | 55% (6)   |
| <i>Anaesthetics</i>       | 59% (48)  | 71% (59)  | 62% (37)      | 74% (31)  | 50% (11)    | 68% (28)  |
| <i>Radiology</i>          | 92% (22)  | 77% (24)  | 100% (15)     | 95% (20)  | 78% (7)     | 40% (4)   |
| <i>Clinical Oncology</i>  | 80% (8)   | 63% (12)  | 71% (5)       | 67% (6)   | 100% (3)    | 60% (6)   |
| <i>Pathology</i>          | 90% (26)  | 74% (26)  | 86% (18)      | 83% (19)  | 100% (8)    | 58% (7)   |
| <i>Psychiatry</i>         | 87% (26)  | 88% (44)  | 94% (15)      | 91% (29)  | 79% (11)    | 83% (15)  |

<sup>a</sup> Question wording: 'Do you regard the NHS as a family-friendly employer for doctors with children?'

<sup>b</sup> Question wording: 'Do you regard your speciality as a family-friendly employer for doctors with children?' (and all lines below Total<sup>b</sup>)

# BMJ Open

## Children and medical careers, some influences and experiences: questionnaire survey of the UK medical graduates of 2002

|                                 |                                                                                                                                                                                                                                                    |
|---------------------------------|----------------------------------------------------------------------------------------------------------------------------------------------------------------------------------------------------------------------------------------------------|
| Journal:                        | <i>BMJ Open</i>                                                                                                                                                                                                                                    |
| Manuscript ID                   | bmjopen-2017-016822.R1                                                                                                                                                                                                                             |
| Article Type:                   | Research                                                                                                                                                                                                                                           |
| Date Submitted by the Author:   | 09-May-2017                                                                                                                                                                                                                                        |
| Complete List of Authors:       | Lambert, Trevor; University of Oxford, Nuffield Department of Population Health<br>Smith, Fay; University of Oxford, Nuffield Department of Population Health<br>Goldacre, Michael; University of Oxford, Nuffield Department of Population Health |
| <b>Primary Subject Heading</b>: | Medical education and training                                                                                                                                                                                                                     |
| Secondary Subject Heading:      | Health services research, Health policy                                                                                                                                                                                                            |
| Keywords:                       | MEDICAL EDUCATION & TRAINING, HEALTH SERVICES ADMINISTRATION & MANAGEMENT, Health policy < HEALTH SERVICES ADMINISTRATION & MANAGEMENT                                                                                                             |
|                                 |                                                                                                                                                                                                                                                    |

SCHOLARONE™  
Manuscripts



1 **Children and medical careers, some influences and experiences:**  
2 **questionnaire survey of the UK medical graduates of 2002**

3  
4 **Short title: Some effects of having a family on medical careers**

5  
6 Trevor W Lambert MSc<sup>1</sup>, Fay Smith PhD<sup>1</sup>, Michael J Goldacre FFPH<sup>1</sup>

7  
8 <sup>1</sup>UK Medical Careers Research Group, Unit of Health-Care Epidemiology, Nuffield  
9 Department of Population Health, University of Oxford, Old Road Campus, Oxford  
10 OX3 7LF

11  
12 Corresponding author:

13 Trevor Lambert ([trevor.lambert@dph.ox.ac.uk](mailto:trevor.lambert@dph.ox.ac.uk); Telephone: 01865 289389)

14  
15 Other email addresses:

16 Fay Smith: [fay.smith@dph.ox.ac.uk](mailto:fay.smith@dph.ox.ac.uk)

17 Michael J Goldacre: [michael.goldacre@dph.ox.ac.uk](mailto:michael.goldacre@dph.ox.ac.uk)

18  
19 **Word count:** [3335 words]

27 **ABSTRACT**

28

29 **Objectives:** To report the self-assessed views of a cohort of medical graduates about the  
30 impact of having (or wanting to have) children on their specialty choice; and the extent to  
31 which their employer was supportive of doctors with children.

32 **Setting:** United Kingdom (UK).

33 **Participants:** UK medical graduates of 2002 surveyed by post and email in 2014.

34 **Results:** The response rate was 64.2% (2057/3205). Most respondents were living with a  
35 spouse or partner (86%) and, of these, 49% had a medical spouse. Having children, or  
36 wanting to have children, had influenced specialty choice for 47% of respondents; for 56% of  
37 doctors with children and 29% of doctors without children; for 59% of women and 28% of  
38 men; and for 78% of general practitioners compared with 27% of hospital doctors and 18%  
39 of surgeons. 42% of respondents regarded the NHS as a family-friendly employer, and 64%  
40 regarded their specialty as family-friendly. More general practitioners (78%) than doctors in  
41 hospital specialties (56%) regarded their specialty as family-friendly, whilst only 32% of  
42 surgeons did so.

43 Of those who had taken maternity/paternity/adoption leave, 49% rated the levels of support  
44 they had received in doing so as *excellent/good*, 32% said it was *acceptable* and 18% said  
45 the support had been *poor/very poor*.

46 **Conclusions:** Having children is a major influence when considering specialty choice for  
47 many doctors, especially women and general practitioners. Surgeons are least influenced in  
48 their career choice by the prospect of parenthood. Almost half of doctors in hospital  
49 specialties regard their specialty as family-friendly.

50

51 [250 words]

52

53

54

55

56

57

58

59

60

1  
2  
3  
4  
5  
6  
7  
8  
9  
10  
11  
12  
13  
14  
15  
16  
17  
18  
19  
20  
21  
22  
23  
24  
25  
26  
27  
28  
29  
30  
31  
32  
33  
34  
35  
36  
37  
38  
39  
40  
41  
42  
43  
44  
45  
46  
47  
48  
49  
50  
51  
52  
53  
54

**Strengths and limitations**

- 55
- This was a national study, with a good level of response, of doctors who graduated from UK medical schools in 2002.
  - The doctors were surveyed in their mid-thirties, 12 years after they had graduated – a time by which about two thirds of doctors have children.
  - The response rate was high for a self-completed survey.
  - However, some level of non-responder bias is, as with all surveys, a possibility.
- 60  
61

62 **Keywords:** Physicians, junior; workforce; medical; family relations, quality of life.

63  
64

**BACKGROUND**

Many factors may affect doctors' Work-Life Balance (WLB). These include factors related to their work, such as their stage of training, specialty, seniority and working pattern; and personal factors including whether or not the doctor has children, whether they live with a spouse or partner, and their gender. Longer work hours are associated with a higher possibility of work-home 'conflict', which in turn is associated, research suggests, with increased likelihood of burnout. [1] Women doctors in the United States (US) were found to have a higher divorce rate than men doctors: greater work hours among women were associated with increased divorce prevalence, but not among men. [2] A Swiss study found that women doctors, especially those with children, have lower rates of employment and lower levels of career success than male doctors; the women doctors in the study showed higher levels of life satisfaction – regardless of parenthood status.[3] A review of women physicians' status and experiences in Japan, Scandinavia, Russia, and Eastern Europe found that women were underrepresented in leadership positions even in countries where they were well represented in the workforce. [4] Despite differences between these countries in terms of women's participation in medicine, societal norms and policies - gender differences remain across specialties and within 'the medical hierarchy'. [4]

Women doctors consider future WLB when making their career choices.[5] In the United Kingdom (UK), domestic circumstances and working hours were of more importance to women doctors than to men doctors when choosing a career specialty.[6] There are clear differences in specialty choice between men and women, with surgery being chosen by a predominance of men, and general practice, paediatrics, and obstetrics and gynaecology being chosen by a predominance of women.[7 8] A UK study found that only 40% of female doctors report taking on roles in addition to their clinical work, compared with 87% of male doctors. [9] Female GPs, especially those with children, have been found to be less involved in education, training, primary care trusts (management organisations covering general/family practice), and hospital service delivery than male GPs.[10]

1 93

2  
3 94 We undertook a multi-purpose survey of all UK-trained doctors who graduated in 2002,  
4  
5 95 twelve years after qualification in 2014. The aim of this paper is to report on the self-  
6  
7 96 assessed views of these doctors about the impact of having (or wanting to have) children on  
8  
9 97 their specialty choice; and the extent to which their employer was supportive of doctors with  
10  
11 98 children. We also report on doctors' views about how family-friendly they felt the National  
12  
13 99 Health Service (NHS) was generally for doctors and specifically in their specialty. We  
14  
15 100 compared the replies of men and women, of those with and without children, and of those  
16  
17 101 working in different areas of medicine.  
18

19 102

20  
21 103 **METHODS**

22  
23 104 The UK Medical Careers Research Group surveyed the UK medical graduates of 2002. We  
24  
25 105 sent identical web-based and postal questionnaires twelve years after qualification (in 2014).  
26  
27 106 Up to four reminders were sent to non-respondents. Further details of the methodology are  
28  
29 107 available elsewhere.[11]  
30

31 108

32  
33 109 Contact details for doctors were supplied to us by the General Medical Council (GMC) under  
34  
35 110 a data sharing agreement. The original cohort size of 4436 (2460 women, 1976 men, 55.5%  
36  
37 111 female) was reduced by 6 deceased doctors (1 man, 5 women), 71 doctors (45 men, 26  
38  
39 112 women) who asked to be excluded, and 290 doctors (113 men, 177 women) for whom the  
40  
41 113 GMC could not supply a current address or email. A further 864 doctors (507 men, 357  
42  
43 114 women) who had not replied to any of our previous surveys of the cohort were excluded from  
44  
45 115 the study due to a GMC embargo which restricted our survey to previous respondents. This  
46  
47 116 left a target population for the survey of 3205 (1895 women, 1310 men, 59.1% female).  
48

49 117

50  
51  
52 118 The rationale for timing the survey approximately 12 years after graduation was that the  
53  
54 119 majority of the target population were of peak childbearing age and were likely to be  
55

1 120 particularly aware of health service provision with regard to employment and family  
2  
3 121 formation.

4  
5 122

6  
7 123 We asked three questions about family formation and children: *'Has the fact of having*  
8  
9 124 *children, or of wanting to have children, influenced your choice of career specialty?'* *'Do you*  
10  
11 125 *regard the NHS as a family-friendly employer for doctors with children?'*, *'Do you regard your*  
12  
13 126 *specialty as a family-friendly specialty for doctors with children?'*. Each of these questions  
14  
15 127 had the options of *Yes, No, Don't know, or Prefer not to answer.*  
16

17 128

18  
19 129 Finally, we asked relevant doctors *'How would you describe the level of support you*  
20  
21 130 *received from employers in helping you to return to work after your most recent period of*  
22  
23 131 *Maternity/Paternity/Adoption leave?'* (with the options of *Excellent, Good, Acceptable, Poor,*  
24  
25 132 *Very poor, Did not return, or Prefer not to answer.*) In analysis we combined responses of  
26  
27 133 excellent and good and refer to the combined group as 'excellent/good', and we similarly  
28  
29 134 combined poor and very poor to form 'poor/very poor', thereby reducing the five response  
30  
31 135 categories of assessment to three.  
32

33 136

34  
35 137 The data were initially analysed by univariable crosstabulation. To test statistical significance  
36  
37 138 we used chi-square statistics, Mann-Whitney tests and Kruskal-Wallis tests. Responses of  
38  
39 139 groups of doctors were compared using the following factors: gender; specialty (except  
40  
41 140 where otherwise stated, grouped by us for analysis into four groups: hospital medical  
42  
43 141 specialties, surgical specialties, general practice / family medicine (GP), other hospital-based  
44  
45 142 specialties combined); whether or not the doctor had children; whether or not the doctor had  
46  
47 143 a spouse / partner; and whether or not any spouse / partner was medically qualified. Under  
48  
49 144 the group 'hospital medical specialties' we included the following: general medicine,  
50  
51 145 cardiology, dermatology, endocrinology, geriatrics, nephrology, neurology, chest medicine,  
52  
53 146 rheumatology/rehabilitation, academic medicine, genito-urinary medicine, genetics,  
54  
55 147 gastroenterology, clinical pharmacology, infectious diseases, and occupational medicine.  
56  
57  
58  
59  
60

1 148 Under 'other hospital-based specialties' we combined the following: paediatrics, emergency  
2  
3 149 medicine, obstetrics & gynaecology, anaesthesia, radiology, clinical oncology, psychiatry  
4  
5 150 and pathology. We used multivariable binary logistic regression to assess the joint effect of  
6  
7 151 factors.

8  
9 152

10  
11 153

## 12 13 154 **RESULTS**

14  
15 155

### 16 17 156 **Response rate**

18  
19 157

20  
21 158 The response rate from the target population (see Method) was 64.2% (2057/3205). Among  
22  
23 159 women the response rate was 66.0% (1250/1895) and among men it was 61.6% (807/1310).  
24  
25 160 60.8% of respondents were women compared with 55.5% in the original cohort (i.e. prior to  
26  
27 161 the exclusions).  
28

29  
30 162

### 31 32 163 **Overview of the sample**

33  
34 164

35  
36 165 Of the 2057 respondents, 91.4% (N=1880) told us they were working in medicine in the UK,  
37  
38 166 5.4% (111) were working in medicine outside the UK, and the remainder were in  
39  
40 167 employment outside medicine (1.3%, 26), not in paid employment (1.4%, 28), or did not give  
41  
42 168 employment details (0.6%, 12).  
43

44  
45 169

46  
47 170 We focused on the 1880 in UK medical employment. Of these, 60.5% were female, and  
48  
49 171 39.5% male. The median age of the respondents was 35.4 years. Most respondents were  
50  
51 172 living with a spouse or partner (86.0%). Of those living with a spouse, 49.2% had a medical  
52  
53 173 spouse. Of 1763 doctors who told us how many children aged under 16 years were resident  
54  
55 174 in their household, 32.7% answered none, 22.6% had one, 35.2% had two, and 9.5% had  
56  
57 175 more than two. The average age of the eldest child was 3.7 years (SD=2.7). 75.3% of  
58

1 176 respondents in UK medical employment were working full-time. GPs were more likely to be  
2  
3 177 working part-time (42.5%) than doctors working in other specialties (15.1%).  
4

5 178

6  
7 179 Women were much less likely than men to be working full-time (men 94.4% (695/736),  
8  
9 180 women 62.6% (696/1112);  $\chi^2_1=239.5$ ,  $p<0.001$ ). Within general practice 84.3% of men and  
10  
11 181 47.3% of women were working full-time (150/178 and 221/467;  $\chi^2_1=70.5$ ,  $p<0.001$ ). Within  
12  
13 182 hospital practice 97.8% of men and 73.5% of women were working full-time (534/546 and  
14  
15 183 456/620;  $\chi^2_1=131.4$ ,  $p<0.001$ ). Women were more likely than men to have no spouse or  
16  
17 184 partner (men 11.1% (80/720), women 15.9% (173/1097);  $\chi^2_1=7.8$ ,  $p=0.005$ ). Among those  
18  
19 185 with a spouse or partner, men were more likely than women to have a medically qualified  
20  
21 186 spouse or partner (men 53.0% (338/638), women 46.6% (426/914);  $\chi^2_1=5.8$ ,  $p=0.016$ ).  
22  
23 187 Women and men were equally likely to have children (men 67.3% (477/709), women 67.3%  
24  
25 188 (709/1054);  $\chi^2_1=0.0$ ,  $p=1.0$ ).  
26

27 189

28  
29  
30 190 **Responses to the question: 'Has the fact of having children, or of wanting to have**  
31  
32 191 **children, influenced your choice of career specialty?'**

33  
34 192 Of all respondents who were working in medicine in the UK and who answered the question  
35  
36 193 (N=1811), 47% answered *yes* and 53% answered *no/don't know*.  
37

38 194

39  
40 195 To examine differences in response by gender, having children, specialty group,  
41  
42 196 partner/spouse status, and working hours, we reduced the working data to the 1716 doctors  
43  
44 197 who had complete data for the five predictors.  
45

46  
47 198 Each of these five predictors showed significant ( $p<0.001$ ) variation when analysed in  
48  
49 199 isolation (Table 1): 59% of women and 28% of men agreed that consideration of children  
50  
51 200 had influenced their career choice; 56% of doctors with children and 29% of doctors without  
52  
53 201 children agreed; 18% of surgeons, 27% of doctors in the hospital medical specialties, 34% of  
54  
55 202 doctors in other hospital specialties, and 78% of doctors in general practice agreed; 50% of  
56  
57 203 doctors with a medically qualified spouse, 49% of doctors with a non-medical spouse, and  
58



1 204 30% of doctors with no spouse agreed; and 37% of doctors who worked full time agreed  
2  
3 205 compared with 76% of doctors who worked less than full time.  
4

5  
6 206 A multivariable logistic regression model was fitted, starting with all five predictors in the  
7  
8 207 model. Partner/spouse status was found not to be a significant predictor. The other four  
9  
10 208 predictors were retained. No interaction terms between predictors were found to improve the  
11  
12 209 fit of the model. The significance of specialty group as a predictor was due to the difference  
13  
14 210 between the responses of GPs and radiologists compared with those of other specialty  
15  
16 211 groups. Appendix 1 shows odds ratios and confidence intervals for the multivariable model  
17  
18 212 by specialty group with four significant factors (the specialty, gender, having children, and  
19  
20 213 full- or part-time working).  
21

22  
23 214 Among women with children 91% (300/331) of GPs and 51% (172/336) of hospital doctors  
24  
25 215 agreed that consideration of children had influenced their career choice, while among men  
26  
27 216 with children, 75% (92/122) of GPs and 21% (70/334) of hospital doctors agreed.  
28

29  
30 217 Among women without children, 61% (68/112) of GPs and 28% (69/247) of hospital doctors  
31  
32 218 agreed, while among men without children 40% (19/48) of GPs and 7% (14/186) of hospital  
33  
34 219 doctors agreed.  
35

36  
37 220 Comparison of agreement rates for women hospital doctors with children showed that 43%  
38  
39 221 (84/196) of those working full time agreed that consideration of children had influenced their  
40  
41 222 career choice, compared with 63% (88/140) of those working part-time. Among women GPs  
42  
43 223 with children the equivalent figures for full timers and less than full timers were much closer  
44  
45 224 at 87% (117/135) and 93% (183/196). Numbers of men working less than full time were  
46  
47 225 insufficient (38 in all) for meaningful comparisons with those working full time.  
48

49  
50 226 **Responses to the question: 'Do you regard the NHS as a family-friendly employer for**  
51  
52 227 **doctors with children?'**  
53

54  
55 228 Of all respondents, 42% answered *yes*, and 58% answered *no/don't know*. To examine  
56  
57 229 differences in response by gender, having children, specialty group, partner/spouse status,  
58

1 230 and working hours, we reduced the subjects to the 1720 doctors who had complete data for  
2  
3 231 the five predictors.

4  
5  
6 232 Three of these five predictors showed significant ( $p < 0.01$ ) variation when analysed in  
7  
8 233 isolation (Table 2): more doctors with children (47%) than doctors without children (35%)  
9  
10 234 regarded the NHS as a family-friendly employer for doctors with children; 44% of doctors  
11  
12 235 with a medically qualified spouse, 45% of doctors with a non-medical spouse, and 33% of  
13  
14 236 doctors with no spouse agreed; and 41% of doctors who worked full time agreed compared  
15  
16 237 with 49% of doctors who worked less than full time.

17  
18  
19 238 A multivariable logistic regression model was fitted, starting with all three predictors which  
20  
21 239 were significant univariably. Partner/spouse status was found not to be a significant  
22  
23 240 predictor. The other two predictors were retained. The interaction term between the  
24  
25 241 remaining two predictors did not improve the fit of the model. Appendix 1 shows odds ratios  
26  
27 242 and confidence intervals for the multivariable model with two significant factors (specialty  
28  
29 243 group, and working hours).

30  
31  
32 244 Among women with children 45% (148/330) of GPs and 56% (189/335) of hospital doctors  
33  
34 245 agreed that the NHS is a family-friendly employer for doctors with children, while among men  
35  
36 246 with children 42% (51/122) of GPs and 40% (135/335) of hospital doctors agreed.

37  
38  
39 247 Among women without children, 30% (34/112) of GPs and 34% (86/250) of hospital doctors  
40  
41 248 agreed, while among men without children 35% (17/49) of GPs and 39% (72/187) of hospital  
42  
43 249 doctors agreed.

44  
45  
46 250 Comparison of agreement rates for women hospital doctors with children showed that 52%  
47  
48 251 (102/196) of those working full time agreed that the NHS is a family-friendly employer for  
49  
50 252 doctors with children, compared with 63% (87/139) of those working part-time. Among  
51  
52 253 women GPs with children the equivalent figures for full timers and less than full timers were  
53  
54 254 closer at 43% (58/135) and 46% (90/195). Numbers of men working less than full time were  
55  
56 255 insufficient (38 in all) for meaningful comparisons with those working full time. Results are  
57  
58  
59  
60

1 256 shown in Appendix 2 for specialties within our 'other hospital specialties' group, though the  
2  
3 257 percentages are based on small counts, are not suitable for multivariable modelling, and  
4  
5 258 should be interpreted with caution.  
6  
7

8 259 **Responses to the question: 'Do you regard your specialty as a family-friendly**  
9  
10 260 **specialty for doctors with children?'**  
11

12  
13 261 Of all respondents, 64% of doctors answered *yes* and 36% answered *no/don't know*. To  
14  
15 262 examine differences in response by gender, having children, specialty group, partner/spouse  
16  
17 263 status, and working hours, we reduced the working data to the 1720 doctors who had  
18  
19 264 complete data for the five predictors.  
20

21  
22 265 Each of these five predictors showed significant ( $p < 0.001$ ) variation when analysed in  
23  
24 266 isolation (Table 3): 69% of women and 57% of men agreed that their specialty is a family-  
25  
26 267 friendly employer for doctors with children; 68% of doctors with children and 57% of doctors  
27  
28 268 without children agreed; 32% of surgeons, 53% of doctors in the hospital medical specialties,  
29  
30 269 88% of psychiatrists, and 78% of doctors in general practice agreed; 63% of doctors with a  
31  
32 270 medically qualified spouse, 69% of doctors with a non-medical spouse, and 55% of doctors  
33  
34 271 with no spouse agreed; and 59% of doctors who worked full time agreed compared with 81%  
35  
36 272 of doctors who worked less than full time.  
37

38  
39 273 A multivariable logistic regression model was fitted, starting with all five predictors in the  
40  
41 274 model. Gender, having children and partner/spouse status were not found to be significant  
42  
43 275 predictors. The other two predictors (specialty group and working hours) were retained. The  
44  
45 276 interaction term between these two predictors did not improve the fit of the model. Doctors  
46  
47 277 from the following specialty groups differed significantly in their responses to this question  
48  
49 278 from doctors in the hospital medical specialties group: those in Surgery were less likely to  
50  
51 279 agree that their specialty was family-friendly, while those in GP, Radiology, Pathology, and  
52  
53 280 Psychiatry were more likely to agree. Appendix 1 shows odds ratios and confidence intervals  
54  
55 281 for the multivariable model with two significant factors (specialty group, and working hours).  
56  
57  
58  
59  
60

1 282 Results are shown in Appendix 2 for specialties within our 'other hospital specialties' group.  
2  
3

#### 4 283 **Level of support received on return to work**

5  
6  
7 284 Of 887 doctors who described the level of support received on their return to work after  
8  
9 285 having a child, 18% said the support had been *poor/very poor* (Table 4). Men rated the level  
10  
11 286 of support more highly than did women. There were no significant differences by specialty  
12  
13 287 group or by working hours. The small number of respondents without a partner appeared to  
14  
15 288 score their support more negatively. See footnote to Table 4 for statistical results.  
16  
17

18 289

19 290

## 20 291 **DISCUSSION**

21 292

### 22 293 **Main findings**

23  
24  
25  
26  
27 294 Almost half of all respondents said that having children, or wanting to have children, had  
28  
29 295 influenced their specialty choice. More doctors with children, more women than men, more  
30  
31 296 doctors who worked less than full time than those who worked full time, and more GPs than  
32  
33 297 hospital doctors agreed with this statement. Although more doctors living with a  
34  
35 298 spouse/partner than those without agreed that having children had influenced their specialty  
36  
37 299 choice, this difference was not significant after adjustment for these other factors. No  
38  
39 300 difference was observed between doctors with a medical spouse and doctors with a non-  
40  
41 301 medical spouse.  
42  
43  
44

45 302

46  
47 303 Two fifths of doctors regarded the NHS as a family-friendly employer for doctors with  
48  
49 304 children and two thirds regarded their specialty as a family-friendly employer for doctors with  
50  
51 305 children. More women than men agreed with the latter proposition. Three quarters of GPs  
52  
53 306 regarded their specialty as family-friendly, whilst only a third of surgeons did so.  
54

55 307  
56  
57  
58  
59  
60

1 308 Almost half of doctors said that the levels of support they had received when taking  
2  
3 309 maternity/paternity/adoption leave was *excellent/good*, though one in five said the support  
4  
5 310 had been *poor/very poor*. More men than women doctors rated the level of support as  
6  
7 311 *excellent/good*. Of those doctors living with a spouse, half had a medical spouse. More  
8  
9 312 doctors living with a spouse/partner rated their level of leave support as *excellent/good* than  
10  
11 313 doctors not living with a spouse; and more doctors living with a medical spouse than doctors  
12  
13 314 with a non-medical spouse rated this support as *excellent/good*.

15 315

17 316 Although it is not explicit in our study, there is interplay between doctors' views of  
18  
19 317 parenthood and the effect it may have on their careers and career choices, and the level of  
20  
21 318 support available within different parts of the health service to doctors who are parents.  
22  
23 319 Concepts such a family-friendliness may be hard to reconcile with the working requirements  
24  
25 320 of certain specialty areas, particularly those in which unanticipated acute conditions may  
26  
27 321 present which require treatment of unknown length or at unsocial times of day or night. The  
28  
29 322 challenge is to manage work in these areas to improve family-friendliness without  
30  
31 323 compromising patient care, at a time when the health service is under unprecedented  
32  
33 324 pressures.

35 325

### 37 326 **Strengths and limitations**

39 327 This was a national study, with a good level of response, of doctors who graduated from UK  
40  
41 328 medical schools in 2002. The doctors were surveyed in their mid-thirties, 12 years after they  
42  
43 329 had graduated – a time by which about two thirds of doctors have children [12] and would be  
44  
45 330 able to respond from their own experience to questions about the family friendliness, or  
46  
47 331 otherwise, of the health service. The response rate was high for a self-completed survey.  
48  
49 332 However, some level of non-responder bias is, as with all surveys, a possibility.

51 333

54 334 The first of our questions asked whether having, or wanting to have, children had influenced  
55  
56 335 the doctors' choice of career specialty. A degree of recall bias is possible in the replies to

1 336 this question. However, many doctors will have considered the implications of having a  
2  
3 337 family at the time they were making their career choices.  
4

5 338

7 339 **Comparison with existing literature**

9 340 Our respondents told us that considerations of parenthood influenced their specialty choice,  
10  
11 341 and we found that more women than men agreed with this, as did doctors with children.

12 342 Other research in the UK has found that women in particular cite considerations of WLB as  
13  
14 343 the most common reason for not pursuing certain career specialties.[13] Research in the US

15 344 found that 78% of women believe that their career has been restricted by having  
16  
17 345 children.[14] Parenthood status has also been found to affect the career development of

18 346 doctors, with parents being less likely to hold a senior role than doctors without children.[15]  
19  
20 347 We found that more GPs than hospital doctors say that parenthood influenced their specialty

21 348 choice. A Swiss study found that more family doctors than hospital doctors are married, and  
22  
23 349 more of them have children.[16] A large-scale Australian study of GPs found that about half

24 350 of the GPs were content with their WLB, and women reported a better WLB than men.[17]  
25  
26 351 One study reported that Australian medical students believed that 'family commitments' were

27 352 very important when making career decisions, and female students believed that working  
28  
29 353 part-time was important for WLB.[18]  
30

31 354

32 355

33 356

34 357 We found that surgeons were less likely to agree that their specialty was family-friendly than  
35  
36 358 were doctors who worked in other specialties. In the US, surgeons have been reported to

37 359 face major challenges when trying to balance their personal and professional lives.[19] In the  
38  
39 360 UK, despite rising numbers of female surgical trainees, the number of LTFT posts available

40 361 is inadequate.[20]  
41

42 362  
43  
44  
45  
46  
47  
48  
49  
50  
51  
52  
53  
54  
55  
56  
57  
58  
59  
60

1 363 Doctors living with a spouse were more positive than doctors without a spouse about support  
2  
3 364 received when taking leave; and of those doctors with a spouse, doctors in dual-doctor  
4  
5 365 relationships were the most positive. There could be financial reasons for this, as one study  
6  
7 366 points out, those in dual-doctor relationships may be able to make lifestyle choices due to  
8  
9 367 their high income.[21] This same study found that having a medically qualified spouse was  
10  
11 368 associated with reduced hours in clinical practice.

12  
13 369

### 14 370 **Implications / conclusions**

15  
16  
17 371 Parenthood is a key influence in GPs' specialty choice. However, doctors in other  
18  
19 372 specialties, especially surgery, are not influenced to the same extent by parenthood  
20  
21 373 considerations when choosing their specialty. Policy-makers should address the fact that  
22  
23 374 only half of doctors working in specialties other than general practice regard their specialty  
24  
25 375 as family-friendly.

26  
27 376

### 28 377 **Declarations**

29  
30  
31 378 Ethical approval: National Research Ethics Service, following referral to the Brighton and  
32  
33 379 Mid-Sussex Research Ethics Committee in its role as a multi-centre research ethics  
34  
35 380 committee (ref 04/Q1907/48 amendment Am02 March 2015).

36  
37 381

38  
39 382 Consent for publication: Not applicable.

40  
41 383

42  
43  
44 384 Availability of data and material: It may be possible for the authors to make tabulated data,  
45  
46 385 produced in the course of this work but not included in the paper, available to interested  
47  
48 386 readers on request.

49  
50 387

51  
52 388 Competing interests: All authors have completed the Unified Competing Interest form at  
53  
54 389 [www.icmje.org/coi\\_disclosure.pdf](http://www.icmje.org/coi_disclosure.pdf) (available on request from the corresponding author) and  
55  
56 390 all authors want to declare: (1) financial support for the submitted work from the policy



1 391 research programme, Department of Health. All authors also declare: (2) no financial  
2  
3 392 relationships with commercial entities that might have an interest in the submitted work; (3)  
4  
5 393 no spouses, partners, or children with relationships with commercial entities that might have  
6  
7 394 an interest in the submitted work; (4) no non-financial interests that may be relevant to the  
8  
9 395 submitted work.

10 396

11  
12  
13 397 Funding: This is an independent report commissioned and funded by the Policy Research  
14  
15 398 Programme in the Department of Health (project number 016/0118). The views expressed  
16  
17 399 are not necessarily those of the funding body.

18 400

19  
20  
21 401 Authors' contributions: TL and MJG designed and conducted the survey. FS and TL  
22  
23 402 designed the analysis. FS performed the analysis and wrote the first draft of the paper. All  
24  
25 403 authors contributed to further drafts and all approved the final version.

26 404

27  
28  
29 405 Acknowledgements: We thank Ritva Ellison for data management and Janet Justice and  
30  
31 406 Alison Stockford for data entry. We are very grateful to all the doctors who participated in the  
32  
33 407 surveys.

34 408

## 35 409 **References**

- 36  
37  
38 410 1. Dyrbye LN, Sotile W, Boone S, et al. A Survey of U.S. Physicians and Their Partners  
39 411 Regarding the Impact of Work-Home Conflict. *J. Gen. Intern. Med.* 2013;1-7  
40  
41 412 2. Ly DP, Seabury SA, Jena AB. Divorce among physicians and other healthcare  
42  
43 413 professionals in the United States: Analysis of census survey data. *BMJ (Online)*  
44  
45 414 2015;**350** doi: 10.1136/bmj.h706[published Online First: Epub Date]].  
46  
47 415 3. Buddeberg-Fischer B, Stamm M, Buddeberg C, et al. The impact of gender and  
48  
49 416 parenthood on physicians' careers - Professional and personal situation seven years  
50  
51 417 after graduation. *BMC Health Services Research* 2010;**10:40**. DOI: **10.1186/1472-**  
52  
53 418 **6963-10-40** doi: 10.1186/1472-6963-10-40[published Online First: Epub Date]].  
54  
55 419 4. Ramakrishnan A, Sambuco D, Jaggi R. Women's Participation in the Medical Profession:  
56  
57 420 Insights from Experiences in Japan, Scandinavia, Russia, and Eastern Europe.



- 1 421 Journal of women's health 2014;**23**(11):927-34 doi:  
2 422 10.1089/jwh.2014.4736[published Online First: Epub Date]].  
3  
4 423 5. Treister-Goltzman Y, Peleg R. Female Physicians and the Work-Family Conflict. The  
5 424 Israel Medical Association journal : IMAJ 2016;**18**(5):261-6  
6  
7 425 6. Smith F, Lambert TW, Goldacre MJ. Factors influencing junior doctors' choices of future  
8 426 specialty: trends over time and demographics based on results from UK national  
9 427 surveys. J. R. Soc. Med. 2015;**108**(10):396-405 doi:  
10 428 10.1177/0141076815599674[published Online First: Epub Date]].  
11  
12 429 7. Svirko E, Goldacre M, Lambert T. Career choices of the United Kingdom medical  
13 430 graduates of 2005, 2008 and 2009: Questionnaire surveys. Med. Teach.  
14 431 2013;**35**(5):365-75  
15  
16 432 8. Lambert TW, Goldacre MJ, Turner G. Career choices of United Kingdom medical  
17 433 graduates of 2002: Questionnaire survey. Med. Educ. 2006;**40**(6):514-21  
18  
19 434 9. Academy of Medical Royal Colleges. Results of the Flexibility and Equality Survey: A  
20 435 report of the Academy Flexible Careers Committee. London, 2013.  
21  
22 436 10. Wedderburn C, Scallan S, Whittle C, et al. The views and experiences of female GPs on  
23 437 professional practice and career support. Education for Primary Care  
24 438 2013;**24**(5):321-29  
25  
26 439 11. Goldacre M, Lambert T. Participation in medicine by graduates of medical schools in the  
27 440 United Kingdom up to 25 years post graduation: National cohort surveys. Acad. Med.  
28 441 2013;**88**(5):699-709  
29  
30 442 12. Goldacre MJ, Davidson JM, Lambert TW. Doctors' age at domestic partnership and  
31 443 parenthood: Cohort studies. Journal of the Royal Society of Medicine, Supplement  
32 444 2012;**105**(9):390-99  
33  
34 445 13. Goldacre MJ, Goldacre R, Lambert TW. Doctors who considered but did not pursue  
35 446 specific clinical specialties as careers: Questionnaire surveys. J. R. Soc. Med.  
36 447 2012;**105**(4):166-76  
37  
38 448 14. Levinson W, Tolle SW, Lewis C. Women in academic medicine. Combining career and  
39 449 family. N. Engl. J. Med. 1989;**321**(22):1511-7 doi:  
40 450 10.1056/NEJM198911303212205[published Online First: Epub Date]].  
41  
42 451 15. Stamm M, Buddeberg-Fischer B. How do physicians and their partners coordinate their  
43 452 careers and private lives? Swiss Medical Weekly 2011;**141**(March)  
44  
45 453 16. Buddeberg-Fischer B, Stamm M, Buddeberg C, et al. The new generation of family  
46 454 physicians - Career motivation, life goals and work-life balance. Swiss Medical  
47 455 Weekly 2008;**138**(21-22):305-12  
48  
49 456 17. Shrestha D, Joyce CM. Aspects of work-life balance of Australian general practitioners:  
50 457 Determinants and possible consequences. Australian Journal of Primary Health  
51 458 2011;**17**(1):40-47 doi: 10.1071/PY10056[published Online First: Epub Date]].  
52  
53  
54  
55  
56  
57  
58  
59  
60

- 1 459 18. Tolhurst HM, Stewart SM. Balancing work, family and other lifestyle aspects: a  
2 460 qualitative study of Australian medical students' attitudes. Med. J. Aust.  
3 461 2004;**181**(7):361-4  
4  
5 462 19. Dyrbye LN, Freischlag J, Kaups KL, et al. Work-Home Conflicts Have a Substantial  
6 463 Impact on Career Decisions That Affect the Adequacy of the Surgical Workforce.  
7 464 Arch. Surg. 2012;**147**(10):933-39 doi: 10.1001/archsurg.2012.835[published Online  
8 465 First: Epub Date]].  
9  
10 466 20. Harries RL, McGoldrick C, Mohan H, et al. Less Than Full-time Training in surgical  
11 467 specialities: Consensus recommendations for flexible training by the Association of  
12 468 Surgeons in Training. International Journal of Surgery 2015;**23**:S10-S14 doi:  
13 469 10.1016/j.ijso.2015.09.016[published Online First: Epub Date]].  
14  
15 470 21. Woodward CA. When a physician marries a physician: Effect of physician-physician  
16 471 marriages on professional activities. Can. Fam. Physician 2005;**51**(JUNE):850-51  
17 472

**Table 1: Responses to the question 'Has the fact of having children, or of wanting to have children, influenced your choice of career specialty?' (numbers and percentages of doctors who replied 'yes')**

| Group                        | Men         |         | Women       |          |
|------------------------------|-------------|---------|-------------|----------|
|                              | % agreement | n/N     | % agreement | n/N      |
| All                          | 28.3        | 195/690 | 59.4        | 609/1026 |
| Has child(ren)               |             |         |             |          |
| Yes                          | 35.5        | 162/456 | 70.8        | 472/667  |
| No                           | 14.1        | 33/234  | 38.2        | 137/359  |
| Specialty                    |             |         |             |          |
| Hospital medical specialties | 13.5        | 20/148  | 38.5        | 65/169   |
| Surgery                      | 14.0        | 19/136  | 28.8        | 17/59    |
| GP                           | 65.3        | 111/170 | 83.1        | 368/443  |
| Paediatrics                  | 8.0         | 2/25    | 35.1        | 33/94    |
| Emergency medicine           | 10.3        | 3/29    | 26.1        | 6/23     |
| Obstetrics and gynaecology   | 10.0        | 1/10    | 11.5        | 3/26     |
| Anaesthesia                  | 11.1        | 9/81    | 52.4        | 43/82    |
| Radiology                    | 50.0        | 12/24   | 73.3        | 22/30    |
| Clinical oncology            | 20.0        | 2/10    | 50.0        | 9/18     |
| Pathology                    | 28.6        | 8/28    | 62.9        | 22/35    |
| Psychiatry                   | 27.6        | 8/29    | 44.7        | 21/47    |
| Partner/spouse status        |             |         |             |          |
| Medical spouse               | 27.7        | 89/321  | 68.4        | 273/399  |
| Non-medical spouse           | 32.2        | 94/292  | 59.7        | 276/462  |
| No spouse                    | 15.6        | 12/77   | 36.4        | 60/165   |
| Working hours                |             |         |             |          |
| Full time                    | 26.5        | 173/652 | 47.9        | 301/628  |
| Less than full time          | 57.9        | 22/38   | 77.4        | 308/398  |

Statistical tests on % agreement:

Children ( $\chi^2_1$ ): Men 34.0, Women 101.5

Specialty group ( $\chi^2_{10}$ ): Men 173.6, Women 223.9

Partner/spouse status ( $\chi^2_2$ ): Men 8.4 ( $p=0.015$ ), Women 49.8

Working hours ( $\chi^2_1$ ): Men 15.9, Women 86.4

All  $p < 0.001$  except where indicated.

**Table 2: Responses to the question ‘Do you regard the NHS as a family-friendly employer for doctors with children?’ (numbers and percentages of doctors who replied ‘yes’)**

| Group                        | Men         |         | Women       |          |
|------------------------------|-------------|---------|-------------|----------|
|                              | % agreement | n/N     | % agreement | n/N      |
| All                          | 39.7        | 275/693 | 44.5        | 457/1027 |
| Has child(ren)               |             |         |             |          |
| Yes                          | 40.7        | 186/457 | 50.7        | 337/665  |
| No                           | 37.7        | 89/236  | 33.1        | 120/362  |
| Specialty                    |             |         |             |          |
| Hospital medical specialties | 40.4        | 61/151  | 41.2        | 70/170   |
| Surgery                      | 37.8        | 51/135  | 39.0        | 23/59    |
| General Practice             | 39.8        | 68/171  | 41.2        | 182/442  |
| Paediatrics                  | 32.0        | 8/25    | 46.3        | 44/95    |
| Emergency medicine           | 50.0        | 15/30   | 52.4        | 11/21    |
| Obstetrics and gynaecology   | 10.0        | 1/10    | 48.1        | 13/27    |
| Anaesthesia                  | 43.2        | 35/81   | 48.8        | 40/82    |
| Radiology                    | 47.8        | 11/23   | 56.7        | 17/30    |
| Clinical oncology            | 40.0        | 4/10    | 47.4        | 9/19     |
| Pathology                    | 42.9        | 12/28   | 51.4        | 18/35    |
| Psychiatry                   | 31.0        | 9/29    | 63.8        | 30/47    |
| Partner/spouse status        |             |         |             |          |
| Medical spouse               | 40.2        | 130/323 | 46.1        | 184/399  |
| Non-medical spouse           | 39.9        | 117/293 | 47.5        | 221/465  |
| No spouse                    | 36.4        | 28/77   | 31.9        | 52/163   |
| Working hours                |             |         |             |          |
| Full time                    | 40.0        | 262/655 | 41.0        | 259/631  |
| Less than full time          | 34.2        | 13/38   | 50.0        | 198/396  |

Statistical tests on % agreement:  
 Children ( $\chi^2_1$ ): Men 0.5 (p=0.496), Women 28.4  
 Specialty group ( $\chi^2_{10}$ ): Men 8.0 (p=0.634), Women 14.5 (p=0.150),  
 Partner/spouse status ( $\chi^2_2$ ): Men 0.4 (p=0.817), Women 12.6 (p=0.002)  
 Working hours ( $\chi^2_1$ ): Men 0.3 (p=0.590), Women 7.5 (p=0.006)  
 All p<0.001 except where indicated.

**Table 3: Responses to the question ‘Do you regard your specialty as a family-friendly employer for doctors with children?’ (numbers and percentages of doctors who replied ‘yes’)**

| Group                        | Men         |         | Women       |          |
|------------------------------|-------------|---------|-------------|----------|
|                              | % agreement | n/N     | % agreement | n/N      |
| All                          | 57.0        | 393/690 | 69.1        | 712/1030 |
| Has child(ren)               |             |         |             |          |
| Yes                          | 57.6        | 261/453 | 75.6        | 505/668  |
| No                           | 55.7        | 132/237 | 57.2        | 207/362  |
| Specialty                    |             |         |             |          |
| Hospital medical specialties | 43.0        | 65/151  | 60.9        | 103/169  |
| Surgery                      | 32.6        | 44/135  | 31.7        | 19/60    |
| GP                           | 79.3        | 134/169 | 78.1        | 345/442  |
| Paediatrics                  | 52.0        | 13/25   | 65.3        | 62/95    |
| Emergency medicine           | 26.7        | 8/30    | 39.1        | 9/23     |
| Obstetrics and gynaecology   | 10.0        | 1/10    | 40.7        | 11/27    |
| Anaesthesia                  | 60.0        | 48/80   | 71.1        | 59/83    |
| Radiology                    | 95.7        | 22/23   | 80.0        | 24/30    |
| Clinical oncology            | 80.0        | 8/10    | 63.2        | 12/19    |
| Pathology                    | 89.3        | 25/28   | 74.3        | 26/35    |
| Psychiatry                   | 86.2        | 25/29   | 89.4        | 42/47    |
| Partner/spouse status        |             |         |             |          |
| Medical spouse               | 53.4        | 172/322 | 70.3        | 281/400  |
| Non-medical spouse           | 62.4        | 181/290 | 72.7        | 339/466  |
| No spouse                    | 51.3        | 40/78   | 56.1        | 92/164   |
| Working hours                |             |         |             |          |
| Full time                    | 55.8        | 364/652 | 61.5        | 390/634  |
| Less than full time          | 76.3        | 29/38   | 81.3        | 322/396  |

Statistical tests on % agreement:

Children ( $\chi^2_1$ ): Men 0.2 (p=0.687), Women 36.5

Specialty group ( $\chi^2_{10}$ ): Men 138.0, Women 93.4

Partner/spouse status ( $\chi^2_2$ ): Men 6.2 (p=0.045), Women 16.1

Working hours ( $\chi^2_1$ ): Men 5.3 (p=0.021), Women 43.8

All p<0.001 except where indicated.

**Table 4: Responses to the question “How would you describe the level of support you received from employers in helping you to return to work after your most recent period of Maternity/Paternity/Adoption leave?”**

| Group                        | Reply to question       |                     |                         | Total<br>N (100%) |
|------------------------------|-------------------------|---------------------|-------------------------|-------------------|
|                              | Excellent/good<br>% (n) | Acceptable<br>% (n) | Poor/very poor<br>% (n) |                   |
| All                          | 49.6 (440)              | 31.8 (282)          | 18.6 (165)              | 887               |
| Gender                       |                         |                     |                         |                   |
| Men                          | 58.7 (135)              | 28.7 (66)           | 12.6 (29)               | 230               |
| Women                        | 46.4 (305)              | 32.9 (216)          | 20.7 (136)              | 657               |
| Specialty                    |                         |                     |                         |                   |
| Hospital medical specialties | 50.4 (67)               | 30.8 (41)           | 18.8 (25)               | 133               |
| Surgery                      | 47.8 (32)               | 34.3 (23)           | 17.9 (12)               | 67                |
| GP                           | 51.1 (193)              | 31.5 (119)          | 17.5 (66)               | 378               |
| Other hospital specialties   | 46.7 (129)              | 33.7 (93)           | 19.6 (54)               | 276               |
| Partner/spouse               |                         |                     |                         |                   |
| Has spouse                   | 50.4 (432)              | 21.0 (266)          | 18.6 (159)              | 857               |
| No spouse                    | 14 (3)                  | 62 (13)             | 24 (5)                  | 21                |
| Working hours                |                         |                     |                         |                   |
| Full time                    | 49.9 (264)              | 31.0 (164)          | 19.1 (101)              | 529               |
| Less than full time          | 49.0 (166)              | 33.6 (114)          | 17.4 (59)               | 339               |

Statistical tests: Gender  $\chi^2=12.5$ ,  $p=0.002$ ; Specialty  $\chi^2=1.5$ ,  $p=0.96$ ; Partner/spouse  $\chi^2=12.9$ ,  $p=0.002$ ; Working hours  $\chi^2=0.8$ ,  $p=0.67$ .

**Appendix 1: Odds ratios and confidence intervals for the multivariable models on effect of having children and on family-friendliness (a, b and c, see footnotes)**

| Group                         | a               |       | b              |       | c               |       |
|-------------------------------|-----------------|-------|----------------|-------|-----------------|-------|
|                               | OR (95% CI)     | p     | OR (95% CI)    | p     | OR (95% CI)     | p     |
| <b>Gender</b>                 |                 |       |                |       |                 |       |
| Male*                         | 1               |       | 1              |       | -               | NS    |
| Female                        | 2.9 (2.2, 3.8)  | <.001 | -              | NS    | -               | NS    |
| <b>Has child(ren)</b>         |                 |       |                |       |                 |       |
| Yes*                          | 1               |       | 1              |       | -               | NS    |
| No                            | 0.3 (0.2, 0.4)  | <.001 | 0.6 (0.5, 0.8) | <.001 | -               | NS    |
| <b>Specialty group</b>        |                 |       |                |       |                 |       |
| Hospital medical specialties* | 1               |       | -              | NS    | 1               |       |
| Surgery                       | 0.9 (0.6, 1.4)  | 0.67  | -              | NS    | 0.5 (0.3, 0.7)  | <.001 |
| GP                            | 8.1 (5.8, 11.5) | <.001 | -              | NS    | 2.8 (2.1, 3.7)  | <.001 |
| Paediatrics                   | 0.8 (0.5, 1.3)  | 0.29  | -              | NS    | 1.4 (0.9, 2.2)  | 0.12  |
| Emergency medicine            | 0.6 (0.3, 1.4)  | 0.23  | -              | NS    | 0.4 (0.2, 0.8)  | 0.01  |
| Obstetrics and gynaecology    | 0.2 (0.1, 0.7)  | 0.01  | -              | NS    | 0.4 (0.2, 0.9)  | 0.02  |
| Anaesthesia                   | 1.5 (0.9, 2.3)  | 0.1   | -              | NS    | 1.8 (1.2, 2.7)  | 0.002 |
| Radiology                     | 5.6 (2.9, 10.8) | <.001 | -              | NS    | 6.4 (2.8, 14.6) | <.001 |
| Clinical oncology             | 2.0 (0.8, 4.6)  | 0.12  | -              | NS    | 2.2 (1, 5)      | 0.06  |
| Pathology                     | 2.6 (1.4, 4.7)  | 0.002 | -              | NS    | 4 (2, 7.7)      | <.001 |
| Psychiatry                    | 1.4 (0.8, 2.5)  | 0.27  | -              | NS    | 6.1 (2.9, 12.8) | <.001 |
| <b>Partner/spouse status</b>  |                 |       |                |       |                 |       |
| Medical spouse*               | -               | NS    | -              | NS    | -               | NS    |
| Non-medical spouse            | -               | NS    | -              | NS    | -               | NS    |
| No spouse                     | -               | NS    | -              | NS    | -               | NS    |
| <b>Working hours</b>          |                 |       |                |       |                 |       |
| Full time*                    | 1               |       | 1              |       | 1               |       |
| Less than full time           | 1.9 (1.4, 2.5)  | <.001 | 1.2 (1.0, 1.6) | <.05  | 2.2 (1.7, 2.9)  | <.001 |

Multivariable model based on numbers of doctors who replied 'yes' to a) Has the fact of having children, or of wanting to have children, influenced your choice of career specialty?; b) Do you regard the NHS as a family-friendly employer for doctors with children?; c) Do you regard your specialty as a family-friendly employer for doctors with children?

\*Reference group for multivariable model.

'Multivariable' denotes binomial logistic regression result for each predictor with all other predictors in the model. We excluded cases where one or more predictors were missing, or where the dependent variable was missing, which reduced the sample size to 1716.

The Odds Ratios (OR) indicate the likelihood that a member of a group would regard the outcome variable as important, compared with a member of the reference group. Thus, for example, compared with a full-time doctor, a part-time doctor was twice as likely to regard children as an important influence on their choice of specialty.

## Appendix 2: Numbers and percentages of respondents answering yes to the questions on family-friendliness<sup>ab</sup>

| Respondent group          | Total     |           | Have children |           | No children |           |
|---------------------------|-----------|-----------|---------------|-----------|-------------|-----------|
|                           | Male      | Female    | Male          | Female    | Male        | Female    |
| Total <sup>a</sup>        | 39% (283) | 43% (475) | 40% (190)     | 50% (348) | 37% (93)    | 32% (127) |
| Total <sup>b</sup>        | 57% (399) | 69% (724) | 57% (263)     | 76% (509) | 55% (136)   | 57% (215) |
| Medical specialties       | 43% (65)  | 60% (105) | 36% (33)      | 67% (67)  | 52% (32)    | 51% (38)  |
| Surgery                   | 32% (45)  | 32% (20)  | 35% (29)      | 46% (12)  | 29% (16)    | 22% (8)   |
| GP                        | 79% (136) | 78% (351) | 81% (97)      | 82% (271) | 75% (39)    | 67% (80)  |
| Other hospital:           | 63% (153) | 68% (248) | 64% (104)     | 74% (159) | 63% (49)    | 60% (89)  |
| <i>Paediatrics</i>        | 54% (14)  | 66% (63)  | 47% (9)       | 73% (43)  | 71% (5)     | 54% (20)  |
| <i>Emergency medicine</i> | 27% (8)   | 39% (9)   | 25% (5)       | 25% (3)   | 30% (3)     | 55% (6)   |
| <i>Anaesthesia</i>        | 59% (48)  | 71% (59)  | 62% (37)      | 74% (31)  | 50% (11)    | 68% (28)  |
| <i>Radiology</i>          | 92% (22)  | 77% (24)  | 100% (15)     | 95% (20)  | 78% (7)     | 40% (4)   |
| <i>Clinical Oncology</i>  | 80% (8)   | 63% (12)  | 71% (5)       | 67% (6)   | 100% (3)    | 60% (6)   |
| <i>Pathology</i>          | 90% (26)  | 74% (26)  | 86% (18)      | 83% (19)  | 100% (8)    | 58% (7)   |
| <i>Psychiatry</i>         | 87% (26)  | 88% (44)  | 94% (15)      | 91% (29)  | 79% (11)    | 83% (15)  |

<sup>a</sup> Question wording: 'Do you regard the NHS as a family-friendly employer for doctors with children?'

<sup>b</sup> Question wording: 'Do you regard your specialty as a family-friendly employer for doctors with children?' (and all lines below Total<sup>b</sup>)



1 **Manuscript ID bmjopen-2017-016822 entitled “Children and medical careers, some influences**  
 2 **and experiences: questionnaire survey of the UK medical graduates of 2002”onse to**  
 3 **Reviewers**

4 Trevor W Lambert, Fay Smith, Michael J Goldacre

5 **STROBE Statement**

|                           | Item No | Recommendation                                                                                                                                                                                    |      |
|---------------------------|---------|---------------------------------------------------------------------------------------------------------------------------------------------------------------------------------------------------|------|
| <b>Title and abstract</b> | 1       | (a) Indicate the study’s design with a commonly used term in the title or the abstract                                                                                                            | DONE |
|                           |         | (b) Provide in the abstract an informative and balanced summary of what was done and what was found                                                                                               | DONE |
| <b>Introduction</b>       |         |                                                                                                                                                                                                   |      |
| Background/rationale      | 2       | Explain the scientific background and rationale for the investigation being reported                                                                                                              | DONE |
| Objectives                | 3       | State specific objectives, including any prespecified hypotheses                                                                                                                                  | DONE |
| <b>Methods</b>            |         |                                                                                                                                                                                                   |      |
| Study design              | 4       | Present key elements of study design early in the paper                                                                                                                                           | DONE |
| Setting                   | 5       | Describe the setting, locations, and relevant dates, including periods of recruitment, exposure, follow-up, and data collection                                                                   | DONE |
| Participants              | 6       | (a) Give the eligibility criteria, and the sources and methods of selection of participants. Describe methods of follow-up                                                                        | DONE |
|                           |         | (b) For matched studies, give matching criteria and number of exposed and unexposed                                                                                                               | N/A  |
| Variables                 | 7       | Clearly define all outcomes, exposures, predictors, potential confounders, and effect modifiers. Give diagnostic criteria, if applicable                                                          | DONE |
| Data sources/measurement  | 8*      | For each variable of interest, give sources of data and details of methods of assessment (measurement). Describe comparability of assessment methods if there is more than one group              | DONE |
| Bias                      | 9       | Describe any efforts to address potential sources of bias                                                                                                                                         | DONE |
| Study size                | 10      | Explain how the study size was arrived at                                                                                                                                                         | DONE |
| Quantitative variables    | 11      | Explain how quantitative variables were handled in the analyses. If applicable, describe which groupings were chosen and why                                                                      | DONE |
| Statistical methods       | 12      | (a) Describe all statistical methods, including those used to control for confounding                                                                                                             | DONE |
|                           |         | (b) Describe any methods used to examine subgroups and interactions                                                                                                                               | DONE |
|                           |         | (c) Explain how missing data were addressed                                                                                                                                                       | DONE |
|                           |         | (d) If applicable, explain how loss to follow-up was addressed                                                                                                                                    | N/A  |
|                           |         | (e) Describe any sensitivity analyses                                                                                                                                                             | N/A  |
| <b>Results</b>            |         |                                                                                                                                                                                                   |      |
| Participants              | 13*     | (a) Report numbers of individuals at each stage of study—eg numbers potentially eligible, examined for eligibility, confirmed eligible, included in the study, completing follow-up, and analysed | DONE |
|                           |         | (b) Give reasons for non-participation at each stage                                                                                                                                              | DONE |
|                           |         | (c) Consider use of a flow diagram                                                                                                                                                                | N/A  |

|    |                          |     |                                                                                                                                                                                                              |      |
|----|--------------------------|-----|--------------------------------------------------------------------------------------------------------------------------------------------------------------------------------------------------------------|------|
| 1  | Descriptive data         | 14* | (a) Give characteristics of study participants (eg demographic, clinical, social) and information on exposures and potential confounders                                                                     | DONE |
| 2  |                          |     | (b) Indicate number of participants with missing data for each variable of interest                                                                                                                          | DONE |
| 3  |                          |     | (c) Summarise follow-up time (eg, average and total amount)                                                                                                                                                  | DONE |
| 4  | Outcome data             | 15* | Report numbers of outcome events or summary measures over time                                                                                                                                               | DONE |
| 5  | Main results             | 16  | (a) Give unadjusted estimates and, if applicable, confounder-adjusted estimates and their precision (eg, 95% confidence interval). Make clear which confounders were adjusted for and why they were included | DONE |
| 6  |                          |     | (b) Report category boundaries when continuous variables were categorized                                                                                                                                    | N/A  |
| 7  |                          |     | (c) If relevant, consider translating estimates of relative risk into absolute risk for a meaningful time period                                                                                             | N/A  |
| 8  | Other analyses           | 17  | Report other analyses done—eg analyses of subgroups and interactions, and sensitivity analyses                                                                                                               | DONE |
| 9  | <b>Discussion</b>        |     |                                                                                                                                                                                                              |      |
| 10 | Key results              | 18  | Summarise key results with reference to study objectives                                                                                                                                                     | DONE |
| 11 | Limitations              | 19  | Discuss limitations of the study, taking into account sources of potential bias or imprecision. Discuss both direction and magnitude of any potential bias                                                   | DONE |
| 12 | Interpretation           | 20  | Give a cautious overall interpretation of results considering objectives, limitations, multiplicity of analyses, results from similar studies, and other relevant evidence                                   | DONE |
| 13 | Generalisability         | 21  | Discuss the generalisability (external validity) of the study results                                                                                                                                        | DONE |
| 14 | <b>Other information</b> |     |                                                                                                                                                                                                              |      |
| 15 | Funding                  | 22  | Give the source of funding and the role of the funders for the present study and, if applicable, for the original study on which the present article is based                                                | DONE |

\*Give information separately for exposed and unexposed groups.

**Note:** An Explanation and Elaboration article discusses each checklist item and gives methodological background and published examples of transparent reporting. The STROBE checklist is best used in conjunction with this article (freely available on the Web sites of PLoS Medicine at <http://www.plosmedicine.org/>, Annals of Internal Medicine at <http://www.annals.org/>, and Epidemiology at <http://www.epidem.com/>). Information on the STROBE Initiative is available at <http://www.strobe-statement.org>.

# BMJ Open

## Combining parenthood with a medical career: questionnaire survey of the UK medical graduates of 2002 covering some influences and experiences

|                                 |                                                                                                                                                                                                                                                    |
|---------------------------------|----------------------------------------------------------------------------------------------------------------------------------------------------------------------------------------------------------------------------------------------------|
| Journal:                        | <i>BMJ Open</i>                                                                                                                                                                                                                                    |
| Manuscript ID                   | bmjopen-2017-016822.R2                                                                                                                                                                                                                             |
| Article Type:                   | Research                                                                                                                                                                                                                                           |
| Date Submitted by the Author:   | 14-Jun-2017                                                                                                                                                                                                                                        |
| Complete List of Authors:       | Lambert, Trevor; University of Oxford, Nuffield Department of Population Health<br>Smith, Fay; University of Oxford, Nuffield Department of Population Health<br>Goldacre, Michael; University of Oxford, Nuffield Department of Population Health |
| <b>Primary Subject Heading</b>: | Medical education and training                                                                                                                                                                                                                     |
| Secondary Subject Heading:      | Health services research, Health policy                                                                                                                                                                                                            |
| Keywords:                       | MEDICAL EDUCATION & TRAINING, HEALTH SERVICES ADMINISTRATION & MANAGEMENT, Health policy < HEALTH SERVICES ADMINISTRATION & MANAGEMENT                                                                                                             |
|                                 |                                                                                                                                                                                                                                                    |

SCHOLARONE™  
Manuscripts

1 **Combining parenthood with a medical career: questionnaire survey of the UK**  
2 **medical graduates of 2002 covering some influences and experiences**

3  
4 **Short title: Combining parenthood with a medical career**

5  
6 Trevor W Lambert MSc<sup>1</sup>, Fay Smith PhD<sup>1</sup>, Michael J Goldacre FFPH<sup>1</sup>

7  
8 <sup>1</sup>UK Medical Careers Research Group, Unit of Health-Care Epidemiology, Nuffield  
9 Department of Population Health, University of Oxford, Old Road Campus, Oxford  
10 OX3 7LF

11  
12 Corresponding author:

13 Trevor Lambert ([trevor.lambert@dph.ox.ac.uk](mailto:trevor.lambert@dph.ox.ac.uk); Telephone: 01865 289389)

14  
15 Other email addresses:

16 Fay Smith: [fay.smith@dph.ox.ac.uk](mailto:fay.smith@dph.ox.ac.uk)

17 Michael J Goldacre: [michael.goldacre@dph.ox.ac.uk](mailto:michael.goldacre@dph.ox.ac.uk)

18  
19 **Word count:** [3335 words]

27 **ABSTRACT**

28

29 **Objectives:** To report the self-assessed views of a cohort of medical graduates about the  
30 impact of having (or wanting to have) children on their specialty choice; and the extent to  
31 which their employer was supportive of doctors with children.

32 **Setting:** United Kingdom (UK).

33 **Participants:** UK medical graduates of 2002 surveyed by post and email in 2014.

34 **Results:** The response rate was 64.2% (2057/3205). Most respondents were living with a  
35 spouse or partner (86%) and, of these, 49% had a medical spouse. Having children, or  
36 wanting to have children, had influenced specialty choice for 47% of respondents; for 56% of  
37 doctors with children and 29% of doctors without children; for 59% of women and 28% of  
38 men; and for 78% of general practitioners compared with 27% of hospital doctors and 18%  
39 of surgeons. 42% of respondents regarded the NHS as a family-friendly employer, and 64%  
40 regarded their specialty as family-friendly. More general practitioners (78%) than doctors in  
41 hospital specialties (56%) regarded their specialty as family-friendly, whilst only 32% of  
42 surgeons did so.

43 Of those who had taken maternity/paternity/adoption leave, 49% rated the levels of support  
44 they had received in doing so as *excellent/good*, 32% said it was *acceptable* and 18% said  
45 the support had been *poor/very poor*.

46 **Conclusions:** Having children is a major influence when considering specialty choice for  
47 many doctors, especially women and general practitioners. Surgeons are least influenced in  
48 their career choice by the prospect of parenthood. Almost half of doctors in hospital  
49 specialties regard their specialty as family-friendly.

50

51 [250 words]

52

53

54

55

56

57

58

59

60

1  
2  
3  
4  
5  
6  
7  
8  
9  
10  
11  
12  
13  
14  
15  
16  
17  
18  
19  
20  
21  
22  
23  
24  
25  
26  
27  
28  
29  
30  
31  
32  
33  
34  
35  
36  
37  
38  
39  
40  
41  
42  
43  
44  
45  
46  
47  
48  
49  
50  
51  
52  
53  
54

**Strengths and limitations**

- 55
- This was a national study, with a good level of response, of doctors who graduated from UK medical schools in 2002.
  - The doctors were surveyed in their mid-thirties, 12 years after they had graduated – a time by which about two thirds of doctors have children.
  - The response rate was high for a self-completed survey.
  - However, some level of non-responder bias is, as with all surveys, a possibility.
- 60  
61  
62  
63  
64

**Keywords:** Physicians, junior; workforce; medical; family relations, quality of life.

**BACKGROUND**

Many factors may affect doctors' Work-Life Balance (WLB). These include factors related to their work, such as their stage of training, specialty, seniority and working pattern; and personal factors including whether or not the doctor has children, whether they live with a spouse or partner, and their gender. Longer work hours are associated with a higher possibility of work-home 'conflict', which in turn is associated, research suggests, with increased likelihood of burnout. [1] Women doctors in the United States (US) were found to have a higher divorce rate than men doctors: greater work hours among women were associated with increased divorce prevalence, but not among men. [2] A Swiss study found that women doctors, especially those with children, have lower rates of employment and lower levels of career success than male doctors; the women doctors in the study showed higher levels of life satisfaction – regardless of parenthood status.[3] A review of women physicians' status and experiences in Japan, Scandinavia, Russia, and Eastern Europe found that women were underrepresented in leadership positions even in countries where they were well represented in the workforce. [4] Despite differences between these countries in terms of women's participation in medicine, societal norms and policies - gender differences remain across specialties and within 'the medical hierarchy'. [4]

Women doctors consider future WLB when making their career choices.[5] In the United Kingdom (UK), domestic circumstances and working hours were of more importance to women doctors than to men doctors when choosing a career specialty.[6] There are clear differences in specialty choice between men and women, with surgery being chosen by a predominance of men, and general practice, paediatrics, and obstetrics and gynaecology being chosen by a predominance of women.[7 8] A UK study found that only 40% of female doctors report taking on roles in addition to their clinical work, compared with 87% of male doctors. [9] Female GPs, especially those with children, have been found to be less involved in education, training, primary care trusts (management organisations covering general/family practice), and hospital service delivery than male GPs.[10]

1 93  
2  
3 94 We undertook a multi-purpose survey of all UK-trained doctors who graduated in 2002,  
4  
5 95 twelve years after qualification in 2014. The main objective of this paper is to report on the  
6  
7 96 self-assessed views of these doctors about the impact of having (or wanting to have)  
8  
9 97 children on their specialty choice. Secondary objectives were to report doctors' views about  
10  
11 98 how family-friendly they felt the National Health Service (NHS) was generally for doctors with  
12  
13 99 children and specifically in their specialty. We compared the replies of men and women, of  
14  
15 100 those with and without children, and of those working in different areas of medicine.  
16  
17 101

## 102 **METHODS**

103 The UK Medical Careers Research Group surveyed the UK medical graduates of 2002. We  
104 sent identical web-based and postal questionnaires twelve years after qualification (in 2014).  
105 Up to four reminders were sent to non-respondents. Further details of the methodology are  
106 available elsewhere.[11]

107  
108 Contact details for doctors were supplied to us by the General Medical Council (GMC) under  
109 a data sharing agreement. The original cohort size of 4436 (2460 women, 1976 men, 55.5%  
110 female) was reduced by 6 deceased doctors (1 man, 5 women), 71 doctors (45 men, 26  
111 women) who asked to be excluded, and 290 doctors (113 men, 177 women) for whom the  
112 GMC could not supply a current address or email. A further 864 doctors (507 men, 357  
113 women) who had not replied to any of our previous surveys of the cohort were excluded from  
114 the study due to a GMC embargo which restricted our survey to previous respondents. This  
115 left a target population for the survey of 3205 (1895 women, 1310 men, 59.1% female).

116  
117 The rationale for timing the survey approximately 12 years after graduation was that the  
118 majority of the target population were of peak childbearing age and were likely to be  
119 particularly aware of health service provision with regard to employment and family  
120 formation.



1 121  
2  
3 122 We asked the following questions about family formation and children: *'Has the fact of*  
4  
5 123 *having children, or of wanting to have children, influenced your choice of career specialty?'*  
6  
7 124 *'Do you regard the NHS as a family-friendly employer for doctors with children?'*, *'Do you*  
8  
9 125 *regard your specialty as a family-friendly specialty for doctors with children?'*. Each of these  
10  
11 126 questions had the options of Yes, No, *Don't know*, or *Prefer not to answer*.

127

128 Finally, we asked relevant doctors *'How would you describe the level of support you*  
129 *received from employers in helping you to return to work after your most recent period of*  
130 *Maternity/Paternity/Adoption leave?'* (with the options of *Excellent, Good, Acceptable, Poor,*  
131 *Very poor, Did not return, or Prefer not to answer*). In analysis we combined responses of  
132 excellent and good and refer to the combined group as 'excellent/good', and we similarly  
133 combined poor and very poor to form 'poor/very poor', thereby reducing the five response  
134 categories of assessment to three.

135

136 The data were initially analysed by univariable crosstabulation. To test statistical significance  
137 we used chi-square statistics, Mann-Whitney tests and Kruskal-Wallis tests. Responses of  
138 groups of doctors were compared using the following factors: gender; specialty (except  
139 where otherwise stated, grouped by us for analysis into four groups: hospital medical  
140 specialties, surgical specialties, general practice / family medicine (GP), other hospital-based  
141 specialties combined); whether or not the doctor had children; whether or not the doctor had  
142 a spouse / partner; and whether or not any spouse / partner was medically qualified. Under  
143 the group 'hospital medical specialties' we included the following: general medicine,  
144 cardiology, dermatology, endocrinology, geriatrics, nephrology, neurology, chest medicine,  
145 rheumatology/rehabilitation, academic medicine, genito-urinary medicine, genetics,  
146 gastroenterology, clinical pharmacology, infectious diseases, and occupational medicine.  
147 Under 'other hospital-based specialties' we combined the following: paediatrics, emergency  
148 medicine, obstetrics & gynaecology, anaesthesia, radiology, clinical oncology, psychiatry

1 149 and pathology. We used multivariable binary logistic regression to assess the joint effect of  
2  
3 150 factors.

4  
5 151

6  
7 152

8  
9 153 **RESULTS**

10 154

11  
12  
13 155 **Response rate**

14  
15 156

16  
17 157 The response rate from the target population (see Method) was 64.2% (2057/3205). Among  
18  
19 158 women the response rate was 66.0% (1250/1895) and among men it was 61.6% (807/1310).  
20  
21 159 60.8% of respondents were women compared with 55.5% in the original cohort (i.e. prior to  
22  
23 160 the exclusions).  
24

25 161

26  
27 162 **Overview of the sample**

28  
29 163

30  
31 164 Of the 2057 respondents, 91.4% (N=1880) told us they were working in medicine in the UK,  
32  
33 165 5.4% (111) were working in medicine outside the UK, and the remainder were in  
34  
35 166 employment outside medicine (1.3%, 26), not in paid employment (1.4%, 28), or did not give  
36  
37 167 employment details (0.6%, 12).  
38

39 168

40  
41 169 We focused on the 1880 in UK medical employment. Of these, 60.5% were female, and  
42  
43 170 39.5% male. The median age of the respondents was 35.4 years. Most respondents were  
44  
45 171 living with a spouse or partner (86.0%). Of those living with a spouse, 49.2% had a medical  
46  
47 172 spouse. Of 1763 doctors who told us how many children aged under 16 years were resident  
48  
49 173 in their household, 32.7% answered none, 22.6% had one, 35.2% had two, and 9.5% had  
50  
51 174 more than two. The average age of the eldest child was 3.7 years (SD=2.7). 75.3% of  
52  
53 175 respondents in UK medical employment were working full-time. GPs were more likely to be  
54  
55 176 working part-time (42.5%) than doctors working in other specialties (15.1%).  
56  
57  
58  
59  
60

1 177  
2  
3 178 Women were much less likely than men to be working full-time (men 94.4% (695/736),  
4  
5 179 women 62.6% (696/1112);  $\chi^2_1=239.5$ ,  $p<0.001$ ). Within general practice 84.3% of men and  
6  
7 180 47.3% of women were working full-time (150/178 and 221/467;  $\chi^2_1=70.5$ ,  $p<0.001$ ). Within  
8  
9 181 hospital practice 97.8% of men and 73.5% of women were working full-time (534/546 and  
10  
11 182 456/620;  $\chi^2_1=131.4$ ,  $p<0.001$ ). Women were more likely than men to have no spouse or  
12  
13 183 partner (men 11.1% (80/720), women 15.9% (173/1097);  $\chi^2_1=7.8$ ,  $p=0.005$ ). Among those  
14  
15 184 with a spouse or partner, men were more likely than women to have a medically qualified  
16  
17 185 spouse or partner (men 53.0% (338/638), women 46.6% (426/914);  $\chi^2_1=5.8$ ,  $p=0.016$ ).  
18  
19 186 Women and men were equally likely to have children (men 67.3% (477/709), women 67.3%  
20  
21 187 (709/1054);  $\chi^2_1=0.0$ ,  $p=1.0$ ).  
22

23 188

24  
25 189 **Responses to the question: 'Has the fact of having children, or of wanting to have**  
26  
27 190 **children, influenced your choice of career specialty?'**  
28

29 191 Of all respondents who were working in medicine in the UK and who answered the question  
30  
31 192 (N=1811), 47% answered *yes* and 53% answered *no/don't know*.  
32

33 193

34  
35 194 To examine differences in response by gender, having children, specialty group,  
36  
37 195 partner/spouse status, and working hours, we reduced the working data to the 1716 doctors  
38  
39 196 who had complete data for the five predictors.  
40

41  
42 197 Each of these five predictors showed significant ( $p<0.001$ ) variation when analysed in  
43  
44 198 isolation (Table 1): 59% of women and 28% of men agreed that consideration of children  
45  
46 199 had influenced their career choice; 56% of doctors with children and 29% of doctors without  
47  
48 200 children agreed; 18% of surgeons, 27% of doctors in the hospital medical specialties, 34% of  
49  
50 201 doctors in other hospital specialties, and 78% of doctors in general practice agreed; 50% of  
51  
52 202 doctors with a medically qualified spouse, 49% of doctors with a non-medical spouse, and  
53  
54 203 30% of doctors with no spouse agreed; and 37% of doctors who worked full time agreed  
55  
56 204 compared with 76% of doctors who worked less than full time.  
57  
58  
59  
60

1 205 A multivariable logistic regression model was then fitted, starting with all five predictors in the  
2  
3 206 model. Partner/spouse status was found not to be a significant predictor. The other four  
4  
5 207 predictors were retained. No interaction terms between predictors were found to improve the  
6  
7 208 fit of the model. The significance of specialty group as a predictor was due to the difference  
8  
9 209 between the responses of GPs and radiologists compared with those of other specialty  
10  
11 210 groups. Appendix 1 shows odds ratios and confidence intervals for the multivariable model  
12  
13 211 by specialty group with four significant factors (the specialty, gender, having children, and  
14  
15 212 full- or part-time working).

16  
17  
18 213 Among women with children 91% (300/331) of GPs and 51% (172/336) of hospital doctors  
19  
20 214 agreed that consideration of children had influenced their career choice, while among men  
21  
22 215 with children, 75% (92/122) of GPs and 21% (70/334) of hospital doctors agreed.

23  
24  
25 216 Among women without children, 61% (68/112) of GPs and 28% (69/247) of hospital doctors  
26  
27 217 agreed, while among men without children 40% (19/48) of GPs and 7% (14/186) of hospital  
28  
29 218 doctors agreed.

30  
31  
32 219 Comparison of agreement rates for women hospital doctors with children showed that 43%  
33  
34 220 (84/196) of those working full time agreed that consideration of children had influenced their  
35  
36 221 career choice, compared with 63% (88/140) of those working part-time. Among women GPs  
37  
38 222 with children the equivalent figures for full timers and less than full timers were much closer  
39  
40 223 at 87% (117/135) and 93% (183/196). Numbers of men working less than full time were  
41  
42 224 insufficient (38 in all) for meaningful comparisons with those working full time.

43  
44  
45 225 **Responses to the question: 'Do you regard the NHS as a family-friendly employer for**  
46  
47 226 **doctors with children?'**

48  
49  
50 227 Of all respondents, 42% answered *yes*, and 58% answered *no/don't know*. To examine  
51  
52 228 differences in response by gender, having children, specialty group, partner/spouse status,  
53  
54 229 and working hours, we reduced the subjects to the 1720 doctors who had complete data for  
55  
56 230 the five predictors.

1 231 Three of these five predictors showed significant ( $p < 0.01$ ) variation when analysed in  
2  
3 232 isolation (Table 2): more doctors with children (47%) than doctors without children (35%)  
4  
5 233 regarded the NHS as a family-friendly employer for doctors with children; 44% of doctors  
6  
7 234 with a medically qualified spouse, 45% of doctors with a non-medical spouse, and 33% of  
8  
9 235 doctors with no spouse agreed; and 41% of doctors who worked full time agreed compared  
10  
11 236 with 49% of doctors who worked less than full time.

14 237 A multivariable logistic regression model was fitted, starting with all three predictors which  
15  
16 238 were significant univariably. Partner/spouse status was found not to be a significant  
17  
18 239 predictor. The other two predictors were retained. The interaction term between the  
19  
20 240 remaining two predictors did not improve the fit of the model. Appendix 1 shows odds ratios  
21  
22 241 and confidence intervals for the multivariable model with two significant factors (specialty  
23  
24 242 group, and working hours).

27 243 Among women with children 45% (148/330) of GPs and 56% (189/335) of hospital doctors  
28  
29 244 agreed that the NHS is a family-friendly employer for doctors with children, while among men  
30  
31 245 with children 42% (51/122) of GPs and 40% (135/335) of hospital doctors agreed.

34 246 Among women without children, 30% (34/112) of GPs and 34% (86/250) of hospital doctors  
35  
36 247 agreed, while among men without children 35% (17/49) of GPs and 39% (72/187) of hospital  
37  
38 248 doctors agreed.

41 249 Comparison of agreement rates for women hospital doctors with children showed that 52%  
42  
43 250 (102/196) of those working full time agreed that the NHS is a family-friendly employer for  
44  
45 251 doctors with children, compared with 63% (87/139) of those working part-time. Among  
46  
47 252 women GPs with children the equivalent figures for full timers and less than full timers were  
48  
49 253 closer at 43% (58/135) and 46% (90/195). Numbers of men working less than full time were  
50  
51 254 insufficient (38 in all) for meaningful comparisons with those working full time. Results are  
52  
53 255 shown in Appendix 2 for specialties within our 'other hospital specialties' group, though the  
54  
55  
56  
57  
58  
59  
60

1 256 percentages are based on small counts, are not suitable for multivariable modelling, and  
2  
3 257 should be interpreted with caution.  
4  
5

6 258 **Responses to the question: ‘Do you regard your specialty as a family-friendly**  
7  
8 259 **specialty for doctors with children?’**  
9

10  
11 260 Of all respondents, 64% of doctors answered *yes* and 36% answered *no/don’t know*. To  
12  
13 261 examine differences in response by gender, having children, specialty group, partner/spouse  
14  
15 262 status, and working hours, we reduced the working data to the 1720 doctors who had  
16  
17 263 complete data for the five predictors.  
18

19  
20 264 Each of these five predictors showed significant ( $p<0.001$ ) variation when analysed in  
21  
22 265 isolation (Table 3): 69% of women and 57% of men agreed that their specialty is a family-  
23  
24 266 friendly employer for doctors with children; 68% of doctors with children and 57% of doctors  
25  
26 267 without children agreed; 32% of surgeons, 53% of doctors in the hospital medical specialties,  
27  
28 268 88% of psychiatrists, and 78% of doctors in general practice agreed; 63% of doctors with a  
29  
30 269 medically qualified spouse, 69% of doctors with a non-medical spouse, and 55% of doctors  
31  
32 270 with no spouse agreed; and 59% of doctors who worked full time agreed compared with 81%  
33  
34 271 of doctors who worked less than full time.  
35  
36

37 272 A multivariable logistic regression model was fitted, starting with all five predictors in the  
38  
39 273 model. Gender, having children and partner/spouse status were not found to be significant  
40  
41 274 predictors. The other two predictors (specialty group and working hours) were retained. The  
42  
43 275 interaction term between these two predictors did not improve the fit of the model. Doctors  
44  
45 276 from the following specialty groups differed significantly in their responses to this question  
46  
47 277 from doctors in the hospital medical specialties group: those in Surgery were less likely to  
48  
49 278 agree that their specialty was family-friendly, while those in GP, Radiology, Pathology, and  
50  
51 279 Psychiatry were more likely to agree. Appendix 1 shows odds ratios and confidence intervals  
52  
53 280 for the multivariable model with two significant factors (specialty group, and working hours).  
54  
55

56  
57 281 Results are shown in Appendix 2 for specialties within our ‘other hospital specialties’ group.  
58  
59  
60

1 282 **Level of support received on return to work**

2  
3  
4 283 Of 887 doctors who described the level of support received on their return to work after  
5  
6 284 having a child, 18% said the support had been *poor/very poor* (Table 4). Men rated the level  
7  
8 285 of support more highly than did women. There were no significant differences by specialty  
9  
10 286 group or by working hours. The small number of respondents without a partner appeared to  
11  
12 287 score their support more negatively. See footnote to Table 4 for statistical results.  
13

14 288

15 289

16  
17  
18  
19 290 **DISCUSSION**

20 291

21  
22  
23 292 **Main findings**

24  
25 293 Almost half of all respondents said that having children, or wanting to have children, had  
26  
27 294 influenced their specialty choice. More doctors with children, more women than men, more  
28  
29 295 doctors who worked less than full time than those who worked full time, and more GPs than  
30  
31 296 hospital doctors agreed with this statement. Although more doctors living with a  
32  
33 297 spouse/partner than those without agreed that having children had influenced their specialty  
34  
35 298 choice, this difference was not significant after adjustment for these other factors. No  
36  
37 299 difference was observed between doctors with a medical spouse and doctors with a non-  
38  
39 300 medical spouse.  
40

41 301

42  
43 302 Two fifths of doctors regarded the NHS as a family-friendly employer for doctors with  
44  
45 303 children and two thirds regarded their specialty as a family-friendly employer for doctors with  
46  
47 304 children. More women than men agreed with the latter statement. Three quarters of GPs  
48  
49 305 regarded their specialty as family-friendly, whilst only a third of surgeons did so.  
50

51 306

52  
53 307 Almost half of doctors said that the levels of support they had received when taking  
54  
55 308 maternity/paternity/adoption leave was *excellent/good*, though one in five said the support  
56  
57  
58  
59  
60



1 309 had been *poor/very poor*. More men than women doctors rated the level of support as  
2  
3 310 *excellent/good*. Of those doctors living with a spouse, half had a medical spouse. More  
4  
5 311 doctors living with a spouse/partner rated their level of leave support as *excellent/good* than  
6  
7 312 doctors not living with a spouse; and more doctors living with a medical spouse than doctors  
8  
9 313 with a non-medical spouse rated this support as *excellent/good*.

10 314

11  
12  
13 315 Although it is not explicit in our study, there is interplay between doctors' views of  
14  
15 316 parenthood and the effect it may have on their careers and career choices, and the level of  
16  
17 317 support available within different parts of the health service to doctors who are parents.  
18  
19 318 Concepts such as family-friendliness may be hard to reconcile with the working requirements  
20  
21 319 of certain specialty areas, particularly those in which unanticipated acute conditions may  
22  
23 320 present which require treatment of unknown length or at unsocial times of day or night. The  
24  
25 321 challenge is to manage work in these areas to improve family-friendliness without  
26  
27 322 compromising patient care, at a time when the health service is under unprecedented  
28  
29 323 pressures.

30 324

### 31 325 **Strengths and limitations**

32  
33  
34 326 This was a national study, with a good level of response, of doctors who graduated from UK  
35  
36 327 medical schools in 2002. The doctors were surveyed in their mid-thirties, 12 years after they  
37  
38 328 had graduated – a time by which about two thirds of doctors have children [12] and would be  
39  
40 329 able to respond from their own experience to questions about the family friendliness, or  
41  
42 330 otherwise, of the health service. The response rate was high for a self-completed survey.  
43  
44 331 However, some level of non-responder bias is, as with all surveys, a possibility. The good  
45  
46 332 response rate, the recency of the survey, and the inclusion of most of the doctors who have  
47  
48 333 had children in the 2002 cohort, indicate that these findings are probably generalisable to  
49  
50 334 doctors who are considering the impact of having children on their specialty choice in  
51  
52 335 England at present.



1 336 The first of our questions asked whether having, or wanting to have, children had influenced  
2  
3 337 the doctors' choice of career specialty. A degree of recall bias is possible in the replies to  
4  
5 338 this question. However, many doctors will have considered the implications of having a  
6  
7 339 family at the time when they were making their career choices.  
8

9 340

#### 11 341 **Comparison with existing literature**

13 342 Our respondents told us that considerations of parenthood influenced their specialty choice,  
14  
15 343 and we found that more women than men agreed with this, as did doctors with children.

17 344 Other research in the UK has found that women in particular cite considerations of WLB as  
18  
19 345 the most common reason for not pursuing certain career specialties.[13] Research in the US  
20  
21 346 found that 78% of women believe that their career has been restricted by having  
22  
23 347 children.[14] Parenthood status has also been found to affect the career development of  
24  
25 348 doctors, with parents being less likely to hold a senior role than doctors without children.[15]

27 349 We found that more GPs than hospital doctors say that parenthood influenced their specialty  
28  
29 350 choice. A Swiss study found that more family doctors than hospital doctors are married, and  
30  
31 351 more of them have children.[16] A large-scale Australian study of GPs found that about half  
32  
33 352 of the GPs were content with their WLB, and women reported a better WLB than men.[17]  
34  
35 353 One study reported that Australian medical students believed that 'family commitments' were  
36  
37 354 very important when making career decisions, and female students believed that working  
38  
39 355 part-time was important for WLB.[18]  
40

41 356

42 357

43 358

47 359 We found that surgeons were less likely to agree that their specialty was family-friendly than  
48  
49 360 were doctors who worked in other specialties. In the US, surgeons have been reported to  
50  
51 361 face major challenges when trying to balance their personal and professional lives.[19] In the  
52  
53 362 UK, despite rising numbers of female surgical trainees, the number of LTFT posts available  
54  
55 363 is inadequate.[20]  
56  
57  
58  
59  
60

1 364

2

3 365

4

5 366

6

7 367

8

9 368

10

11 369

12

13 370

14

15 371

16

17 372

18

19 373

20

21 374

22

23 375

24

25 376

26

27 377

28

29 378

30

31 379

32

33 380

34

35 381

36

37 382

38

39 383

40

41 384

42

43 385

44

45 386

46

47 387

48

49 388

50

51 389

52

53 390

54

55

56

57

58

59

60

Doctors living with a spouse were more positive than doctors without a spouse about support received when taking leave; and of those doctors with a spouse, doctors in dual-doctor relationships were the most positive. There could be financial reasons for this, as one study points out, those in dual-doctor relationships may be able to make lifestyle choices due to their high joint income.[21] This same study found that having a medically qualified spouse was associated with reduced hours in clinical practice.

### 372 **Implications / conclusions**

373 Parenthood is a key influence in choosing general practice as a career. It is noteworthy that 374 considerations of parenthood should have such a profound effect on doctors' career choice. 375 Doctors in other specialties, especially surgery, are not influenced to the same extent by 376 parenthood considerations when choosing their specialty. Policy-makers should address the 377 fact that only half of doctors working in specialties other than general practice regard their 378 specialty as family-friendly.

### 380 **Declarations**

381 Ethical approval: National Research Ethics Service, following referral to the Brighton and 382 Mid-Sussex Research Ethics Committee in its role as a multi-centre research ethics 383 committee (ref 04/Q1907/48 amendment Am02 March 2015).

385 Consent for publication: Not applicable.

387 Availability of data and material: It may be possible for the authors to make tabulated data, 388 produced in the course of this work but not included in the paper, available to interested 389 readers on request.

1 391 Competing interests: All authors have completed the Unified Competing Interest form at  
2  
3 392 [www.icmje.org/coi\\_disclosure.pdf](http://www.icmje.org/coi_disclosure.pdf) (available on request from the corresponding author) and  
4  
5 393 all authors want to declare: (1) financial support for the submitted work from the policy  
6  
7 394 research programme, Department of Health. All authors also declare: (2) no financial  
8  
9 395 relationships with commercial entities that might have an interest in the submitted work; (3)  
10  
11 396 no spouses, partners, or children with relationships with commercial entities that might have  
12  
13 397 an interest in the submitted work; (4) no non-financial interests that may be relevant to the  
14  
15 398 submitted work.  
16

17 399

18  
19 400 Funding: This is an independent report commissioned and funded by the Policy Research  
20  
21 401 Programme in the Department of Health (project number 016/0118). The views expressed  
22  
23 402 are not necessarily those of the funding body.  
24

25 403

26  
27 404 Authors' contributions: TL and MJG designed and conducted the survey. FS and TL  
28  
29 405 designed the analysis. FS performed the analysis and wrote the first draft of the paper. All  
30  
31 406 authors contributed to further drafts and all approved the final version.  
32

33 407

34  
35 408 Acknowledgements: We thank Ritva Ellison for data management and Janet Justice and  
36  
37 409 Alison Stockford for data entry. We are very grateful to all the doctors who participated in the  
38  
39 410 surveys.  
40

41 411

## 42 412 **References**

- 43  
44  
45 413 1. Dyrbye LN, Sotile W, Boone S, et al. A Survey of U.S. Physicians and Their Partners  
46  
47 414 Regarding the Impact of Work-Home Conflict. *J. Gen. Intern. Med.* 2013;1-7  
48  
49 415 2. Ly DP, Seabury SA, Jena AB. Divorce among physicians and other healthcare  
50  
51 416 professionals in the United States: Analysis of census survey data. *BMJ (Online)*  
52  
53 417 2015;**350** doi: 10.1136/bmj.h706[published Online First: Epub Date].  
54  
55 418 3. Buddeberg-Fischer B, Stamm M, Buddeberg C, et al. The impact of gender and  
56  
57 419 parenthood on physicians' careers - Professional and personal situation seven years  
58

- 1 420 after graduation. BMC Health Services Research 2010;**10:40**. DOI: **10.1186/1472-**  
2 421 **6963-10-40** doi: 10.1186/1472-6963-10-40[published Online First: Epub Date]].
- 3  
4 422 4. Ramakrishnan A, Sambuco D, Jagsi R. Women's Participation in the Medical Profession:  
5 423 Insights from Experiences in Japan, Scandinavia, Russia, and Eastern Europe.  
6 424 Journal of women's health 2014;**23**(11):927-34 doi:  
7 425 10.1089/jwh.2014.4736[published Online First: Epub Date]].
- 8  
9 426 5. Treister-Goltzman Y, Peleg R. Female Physicians and the Work-Family Conflict. The  
10 427 Israel Medical Association journal : IMAJ 2016;**18**(5):261-6
- 11  
12 428 6. Smith F, Lambert TW, Goldacre MJ. Factors influencing junior doctors' choices of future  
13 429 specialty: trends over time and demographics based on results from UK national  
14 430 surveys. J. R. Soc. Med. 2015;**108**(10):396-405 doi:  
15 431 10.1177/0141076815599674[published Online First: Epub Date]].
- 16  
17 432 7. Svirko E, Goldacre M, Lambert T. Career choices of the United Kingdom medical  
18 433 graduates of 2005, 2008 and 2009: Questionnaire surveys. Med. Teach.  
19 434 2013;**35**(5):365-75
- 20  
21 435 8. Lambert TW, Goldacre MJ, Turner G. Career choices of United Kingdom medical  
22 436 graduates of 2002: Questionnaire survey. Med. Educ. 2006;**40**(6):514-21
- 23  
24 437 9. Academy of Medical Royal Colleges. Results of the Flexibility and Equality Survey: A  
25 438 report of the Academy Flexible Careers Committee. London, 2013.
- 26  
27 439 10. Wedderburn C, Scallan S, Whittle C, et al. The views and experiences of female GPs on  
28 440 professional practice and career support. Education for Primary Care  
29 441 2013;**24**(5):321-29
- 30  
31 442 11. Goldacre M, Lambert T. Participation in medicine by graduates of medical schools in the  
32 443 United Kingdom up to 25 years post graduation: National cohort surveys. Acad. Med.  
33 444 2013;**88**(5):699-709
- 34  
35 445 12. Goldacre MJ, Davidson JM, Lambert TW. Doctors' age at domestic partnership and  
36 446 parenthood: Cohort studies. Journal of the Royal Society of Medicine, Supplement  
37 447 2012;**105**(9):390-99
- 38  
39 448 13. Goldacre MJ, Goldacre R, Lambert TW. Doctors who considered but did not pursue  
40 449 specific clinical specialties as careers: Questionnaire surveys. J. R. Soc. Med.  
41 450 2012;**105**(4):166-76
- 42  
43 451 14. Levinson W, Tolle SW, Lewis C. Women in academic medicine. Combining career and  
44 452 family. N. Engl. J. Med. 1989;**321**(22):1511-7 doi:  
45 453 10.1056/NEJM198911303212205[published Online First: Epub Date]].
- 46  
47 454 15. Stamm M, Buddeberg-Fischer B. How do physicians and their partners coordinate their  
48 455 careers and private lives? Swiss Medical Weekly 2011;**141**(March)

- 1 456 16. Buddeberg-Fischer B, Stamm M, Buddeberg C, et al. The new generation of family  
2 457 physicians - Career motivation, life goals and work-life balance. Swiss Medical  
3 458 Weekly 2008;**138**(21-22):305-12
- 4 459 17. Shrestha D, Joyce CM. Aspects of work-life balance of Australian general practitioners:  
5 460 Determinants and possible consequences. Australian Journal of Primary Health  
6 461 2011;**17**(1):40-47 doi: 10.1071/PY10056[published Online First: Epub Date]].  
7 462 18. Tolhurst HM, Stewart SM. Balancing work, family and other lifestyle aspects: a  
8 463 qualitative study of Australian medical students' attitudes. Med. J. Aust.  
9 464 2004;**181**(7):361-4
- 10 465 19. Dyrbye LN, Freischlag J, Kaups KL, et al. Work-Home Conflicts Have a Substantial  
11 466 Impact on Career Decisions That Affect the Adequacy of the Surgical Workforce.  
12 467 Arch. Surg. 2012;**147**(10):933-39 doi: 10.1001/archsurg.2012.835[published Online  
13 468 First: Epub Date]].
- 14 469 20. Harries RL, McGoldrick C, Mohan H, et al. Less Than Full-time Training in surgical  
15 470 specialities: Consensus recommendations for flexible training by the Association of  
16 471 Surgeons in Training. International Journal of Surgery 2015;**23**:S10-S14 doi:  
17 472 10.1016/j.ijso.2015.09.016[published Online First: Epub Date]].
- 18 473 21. Woodward CA. When a physician marries a physician: Effect of physician-physician  
19 474 marriages on professional activities. Can. Fam. Physician 2005;**51**(JUNE):850-51  
20 475

**Table 1: Responses to the question 'Has the fact of having children, or of wanting to have children, influenced your choice of career specialty?' (numbers and percentages of doctors who replied 'yes')**

| Group                        | Men         |         | Women       |          |
|------------------------------|-------------|---------|-------------|----------|
|                              | % agreement | n/N     | % agreement | n/N      |
| All                          | 28.3        | 195/690 | 59.4        | 609/1026 |
| Has child(ren)               |             |         |             |          |
| Yes                          | 35.5        | 162/456 | 70.8        | 472/667  |
| No                           | 14.1        | 33/234  | 38.2        | 137/359  |
| Specialty                    |             |         |             |          |
| Hospital medical specialties | 13.5        | 20/148  | 38.5        | 65/169   |
| Surgery                      | 14.0        | 19/136  | 28.8        | 17/59    |
| GP                           | 65.3        | 111/170 | 83.1        | 368/443  |
| Paediatrics                  | 8.0         | 2/25    | 35.1        | 33/94    |
| Emergency medicine           | 10.3        | 3/29    | 26.1        | 6/23     |
| Obstetrics and gynaecology   | 10.0        | 1/10    | 11.5        | 3/26     |
| Anaesthesia                  | 11.1        | 9/81    | 52.4        | 43/82    |
| Radiology                    | 50.0        | 12/24   | 73.3        | 22/30    |
| Clinical oncology            | 20.0        | 2/10    | 50.0        | 9/18     |
| Pathology                    | 28.6        | 8/28    | 62.9        | 22/35    |
| Psychiatry                   | 27.6        | 8/29    | 44.7        | 21/47    |
| Partner/spouse status        |             |         |             |          |
| Medical spouse               | 27.7        | 89/321  | 68.4        | 273/399  |
| Non-medical spouse           | 32.2        | 94/292  | 59.7        | 276/462  |
| No spouse                    | 15.6        | 12/77   | 36.4        | 60/165   |
| Working hours                |             |         |             |          |
| Full time                    | 26.5        | 173/652 | 47.9        | 301/628  |
| Less than full time          | 57.9        | 22/38   | 77.4        | 308/398  |

Statistical tests on % agreement:

Children ( $\chi^2_1$ ): Men 34.0, Women 101.5

Specialty group ( $\chi^2_{10}$ ): Men 173.6, Women 223.9

Partner/spouse status ( $\chi^2_2$ ): Men 8.4 (p=0.015), Women 49.8

Working hours ( $\chi^2_1$ ): Men 15.9, Women 86.4

All p<0.001 except where indicated.

**Table 2: Responses to the question ‘Do you regard the NHS as a family-friendly employer for doctors with children?’ (numbers and percentages of doctors who replied ‘yes’)**

| Group                        | Men         |         | Women       |          |
|------------------------------|-------------|---------|-------------|----------|
|                              | % agreement | n/N     | % agreement | n/N      |
| All                          | 39.7        | 275/693 | 44.5        | 457/1027 |
| Has child(ren)               |             |         |             |          |
| Yes                          | 40.7        | 186/457 | 50.7        | 337/665  |
| No                           | 37.7        | 89/236  | 33.1        | 120/362  |
| Specialty                    |             |         |             |          |
| Hospital medical specialties | 40.4        | 61/151  | 41.2        | 70/170   |
| Surgery                      | 37.8        | 51/135  | 39.0        | 23/59    |
| General Practice             | 39.8        | 68/171  | 41.2        | 182/442  |
| Paediatrics                  | 32.0        | 8/25    | 46.3        | 44/95    |
| Emergency medicine           | 50.0        | 15/30   | 52.4        | 11/21    |
| Obstetrics and gynaecology   | 10.0        | 1/10    | 48.1        | 13/27    |
| Anaesthesia                  | 43.2        | 35/81   | 48.8        | 40/82    |
| Radiology                    | 47.8        | 11/23   | 56.7        | 17/30    |
| Clinical oncology            | 40.0        | 4/10    | 47.4        | 9/19     |
| Pathology                    | 42.9        | 12/28   | 51.4        | 18/35    |
| Psychiatry                   | 31.0        | 9/29    | 63.8        | 30/47    |
| Partner/spouse status        |             |         |             |          |
| Medical spouse               | 40.2        | 130/323 | 46.1        | 184/399  |
| Non-medical spouse           | 39.9        | 117/293 | 47.5        | 221/465  |
| No spouse                    | 36.4        | 28/77   | 31.9        | 52/163   |
| Working hours                |             |         |             |          |
| Full time                    | 40.0        | 262/655 | 41.0        | 259/631  |
| Less than full time          | 34.2        | 13/38   | 50.0        | 198/396  |

Statistical tests on % agreement:  
 Children ( $\chi^2_1$ ): Men 0.5 (p=0.496), Women 28.4  
 Specialty group ( $\chi^2_{10}$ ): Men 8.0 (p=0.634), Women 14.5 (p=0.150),  
 Partner/spouse status ( $\chi^2_2$ ): Men 0.4 (p=0.817), Women 12.6 (p=0.002)  
 Working hours ( $\chi^2_1$ ): Men 0.3 (p=0.590), Women 7.5 (p=0.006)  
 All p<0.001 except where indicated.

**Table 3: Responses to the question ‘Do you regard your specialty as a family-friendly employer for doctors with children?’ (numbers and percentages of doctors who replied ‘yes’)**

| Group                        | Men         |         | Women       |          |
|------------------------------|-------------|---------|-------------|----------|
|                              | % agreement | n/N     | % agreement | n/N      |
| All                          | 57.0        | 393/690 | 69.1        | 712/1030 |
| Has child(ren)               |             |         |             |          |
| Yes                          | 57.6        | 261/453 | 75.6        | 505/668  |
| No                           | 55.7        | 132/237 | 57.2        | 207/362  |
| Specialty                    |             |         |             |          |
| Hospital medical specialties | 43.0        | 65/151  | 60.9        | 103/169  |
| Surgery                      | 32.6        | 44/135  | 31.7        | 19/60    |
| GP                           | 79.3        | 134/169 | 78.1        | 345/442  |
| Paediatrics                  | 52.0        | 13/25   | 65.3        | 62/95    |
| Emergency medicine           | 26.7        | 8/30    | 39.1        | 9/23     |
| Obstetrics and gynaecology   | 10.0        | 1/10    | 40.7        | 11/27    |
| Anaesthesia                  | 60.0        | 48/80   | 71.1        | 59/83    |
| Radiology                    | 95.7        | 22/23   | 80.0        | 24/30    |
| Clinical oncology            | 80.0        | 8/10    | 63.2        | 12/19    |
| Pathology                    | 89.3        | 25/28   | 74.3        | 26/35    |
| Psychiatry                   | 86.2        | 25/29   | 89.4        | 42/47    |
| Partner/spouse status        |             |         |             |          |
| Medical spouse               | 53.4        | 172/322 | 70.3        | 281/400  |
| Non-medical spouse           | 62.4        | 181/290 | 72.7        | 339/466  |
| No spouse                    | 51.3        | 40/78   | 56.1        | 92/164   |
| Working hours                |             |         |             |          |
| Full time                    | 55.8        | 364/652 | 61.5        | 390/634  |
| Less than full time          | 76.3        | 29/38   | 81.3        | 322/396  |

Statistical tests on % agreement:  
 Children ( $\chi^2_1$ ): Men 0.2 (p=0.687), Women 36.5  
 Specialty group ( $\chi^2_{10}$ ): Men 138.0, Women 93.4  
 Partner/spouse status ( $\chi^2_2$ ): Men 6.2 (p=0.045), Women 16.1  
 Working hours ( $\chi^2_1$ ): Men 5.3 (p=0.021), Women 43.8  
 All p<0.001 except where indicated.



**Table 4: Responses to the question “How would you describe the level of support you received from employers in helping you to return to work after your most recent period of Maternity/Paternity/Adoption leave?”**

| Group                        | Reply to question       |                     |                         | Total<br>N (100%) |
|------------------------------|-------------------------|---------------------|-------------------------|-------------------|
|                              | Excellent/good<br>% (n) | Acceptable<br>% (n) | Poor/very poor<br>% (n) |                   |
| All                          | 49.6 (440)              | 31.8 (282)          | 18.6 (165)              | 887               |
| Gender                       |                         |                     |                         |                   |
| Men                          | 58.7 (135)              | 28.7 (66)           | 12.6 (29)               | 230               |
| Women                        | 46.4 (305)              | 32.9 (216)          | 20.7 (136)              | 657               |
| Specialty                    |                         |                     |                         |                   |
| Hospital medical specialties | 50.4 (67)               | 30.8 (41)           | 18.8 (25)               | 133               |
| Surgery                      | 47.8 (32)               | 34.3 (23)           | 17.9 (12)               | 67                |
| GP                           | 51.1 (193)              | 31.5 (119)          | 17.5 (66)               | 378               |
| Other hospital specialties   | 46.7 (129)              | 33.7 (93)           | 19.6 (54)               | 276               |
| Partner/spouse               |                         |                     |                         |                   |
| Has spouse                   | 50.4 (432)              | 21.0 (266)          | 18.6 (159)              | 857               |
| No spouse                    | 14 (3)                  | 62 (13)             | 24 (5)                  | 21                |
| Working hours                |                         |                     |                         |                   |
| Full time                    | 49.9 (264)              | 31.0 (164)          | 19.1 (101)              | 529               |
| Less than full time          | 49.0 (166)              | 33.6 (114)          | 17.4 (59)               | 339               |

Statistical tests: Gender  $\chi^2=12.5$ ,  $p=0.002$ ; Specialty  $\chi^2=1.5$ ,  $p=0.96$ ; Partner/spouse  $\chi^2=12.9$ ,  $p=0.002$ ; Working hours  $\chi^2=0.8$ ,  $p=0.67$ .

**Appendix 1: Odds ratios and confidence intervals for the multivariable models on effect of having children and on family-friendliness (a, b and c, see footnotes)**

| Group                         | a               |       | b              |       | c               |       |
|-------------------------------|-----------------|-------|----------------|-------|-----------------|-------|
|                               | OR (95% CI)     | p     | OR (95% CI)    | p     | OR (95% CI)     | p     |
| <b>Gender</b>                 |                 |       |                |       |                 |       |
| Male*                         | 1               |       | 1              |       | -               | NS    |
| Female                        | 2.9 (2.2, 3.8)  | <.001 | -              | NS    | -               | NS    |
| <b>Has child(ren)</b>         |                 |       |                |       |                 |       |
| Yes*                          | 1               |       | 1              |       | -               | NS    |
| No                            | 0.3 (0.2, 0.4)  | <.001 | 0.6 (0.5, 0.8) | <.001 | -               | NS    |
| <b>Specialty group</b>        |                 |       |                |       |                 |       |
| Hospital medical specialties* | 1               |       | -              | NS    | 1               |       |
| Surgery                       | 0.9 (0.6, 1.4)  | 0.67  | -              | NS    | 0.5 (0.3, 0.7)  | <.001 |
| GP                            | 8.1 (5.8, 11.5) | <.001 | -              | NS    | 2.8 (2.1, 3.7)  | <.001 |
| Paediatrics                   | 0.8 (0.5, 1.3)  | 0.29  | -              | NS    | 1.4 (0.9, 2.2)  | 0.12  |
| Emergency medicine            | 0.6 (0.3, 1.4)  | 0.23  | -              | NS    | 0.4 (0.2, 0.8)  | 0.01  |
| Obstetrics and gynaecology    | 0.2 (0.1, 0.7)  | 0.01  | -              | NS    | 0.4 (0.2, 0.9)  | 0.02  |
| Anaesthesia                   | 1.5 (0.9, 2.3)  | 0.1   | -              | NS    | 1.8 (1.2, 2.7)  | 0.002 |
| Radiology                     | 5.6 (2.9, 10.8) | <.001 | -              | NS    | 6.4 (2.8, 14.6) | <.001 |
| Clinical oncology             | 2.0 (0.8, 4.6)  | 0.12  | -              | NS    | 2.2 (1, 5)      | 0.06  |
| Pathology                     | 2.6 (1.4, 4.7)  | 0.002 | -              | NS    | 4 (2, 7.7)      | <.001 |
| Psychiatry                    | 1.4 (0.8, 2.5)  | 0.27  | -              | NS    | 6.1 (2.9, 12.8) | <.001 |
| <b>Partner/spouse status</b>  |                 |       |                |       |                 |       |
| Medical spouse*               | -               | NS    | -              | NS    | -               | NS    |
| Non-medical spouse            | -               | NS    | -              | NS    | -               | NS    |
| No spouse                     | -               | NS    | -              | NS    | -               | NS    |
| <b>Working hours</b>          |                 |       |                |       |                 |       |
| Full time*                    | 1               |       | 1              |       | 1               |       |
| Less than full time           | 1.9 (1.4, 2.5)  | <.001 | 1.2 (1.0, 1.6) | <.05  | 2.2 (1.7, 2.9)  | <.001 |

Multivariable model based on numbers of doctors who replied 'yes' to a) Has the fact of having children, or of wanting to have children, influenced your choice of career specialty?; b) Do you regard the NHS as a family-friendly employer for doctors with children?; c) Do you regard your specialty as a family-friendly employer for doctors with children?

\*Reference group for multivariable model.

'Multivariable' denotes binomial logistic regression result for each predictor with all other predictors in the model. We excluded cases where one or more predictors were missing, or where the dependent variable was missing, which reduced the sample size to 1716.

The Odds Ratios (OR) indicate the likelihood that a member of a group would regard the outcome variable as important, compared with a member of the reference group. Thus, for example, compared with a full-time doctor, a part-time doctor was twice as likely to regard children as an important influence on their choice of specialty.

## Appendix 2: Numbers and percentages of respondents answering yes to the questions on family-friendliness<sup>ab</sup>

| Respondent group          | Total     |           | Have children |           | No children |           |
|---------------------------|-----------|-----------|---------------|-----------|-------------|-----------|
|                           | Male      | Female    | Male          | Female    | Male        | Female    |
| Total <sup>a</sup>        | 39% (283) | 43% (475) | 40% (190)     | 50% (348) | 37% (93)    | 32% (127) |
| Total <sup>b</sup>        | 57% (399) | 69% (724) | 57% (263)     | 76% (509) | 55% (136)   | 57% (215) |
| Medical specialties       | 43% (65)  | 60% (105) | 36% (33)      | 67% (67)  | 52% (32)    | 51% (38)  |
| Surgery                   | 32% (45)  | 32% (20)  | 35% (29)      | 46% (12)  | 29% (16)    | 22% (8)   |
| GP                        | 79% (136) | 78% (351) | 81% (97)      | 82% (271) | 75% (39)    | 67% (80)  |
| Other hospital:           | 63% (153) | 68% (248) | 64% (104)     | 74% (159) | 63% (49)    | 60% (89)  |
| <i>Paediatrics</i>        | 54% (14)  | 66% (63)  | 47% (9)       | 73% (43)  | 71% (5)     | 54% (20)  |
| <i>Emergency medicine</i> | 27% (8)   | 39% (9)   | 25% (5)       | 25% (3)   | 30% (3)     | 55% (6)   |
| <i>Anaesthesia</i>        | 59% (48)  | 71% (59)  | 62% (37)      | 74% (31)  | 50% (11)    | 68% (28)  |
| <i>Radiology</i>          | 92% (22)  | 77% (24)  | 100% (15)     | 95% (20)  | 78% (7)     | 40% (4)   |
| <i>Clinical Oncology</i>  | 80% (8)   | 63% (12)  | 71% (5)       | 67% (6)   | 100% (3)    | 60% (6)   |
| <i>Pathology</i>          | 90% (26)  | 74% (26)  | 86% (18)      | 83% (19)  | 100% (8)    | 58% (7)   |
| <i>Psychiatry</i>         | 87% (26)  | 88% (44)  | 94% (15)      | 91% (29)  | 79% (11)    | 83% (15)  |

<sup>a</sup> Question wording: 'Do you regard the NHS as a family-friendly employer for doctors with children?'

<sup>b</sup> Question wording: 'Do you regard your specialty as a family-friendly employer for doctors with children?' (and all lines below Total<sup>b</sup>)

1 **Manuscript ID bmjopen-2017-016822 entitled “Combining parenthood with a medical career:**  
 2 questionnaire survey of the UK medical graduates of 2002 covering some influences and  
 3 experiences”  
 4  
 5  
 6

7 Trevor W Lambert, Fay Smith, Michael J Goldacre  
 8  
 9

## 10 **STROBE Statement**

|                              | <b>Item No</b> | <b>Recommendation</b>                                                                                                                                                                             |          |
|------------------------------|----------------|---------------------------------------------------------------------------------------------------------------------------------------------------------------------------------------------------|----------|
| <b>Title and abstract</b>    | 1              | (a) Indicate the study’s design with a commonly used term in the title or the abstract                                                                                                            | Page 1   |
|                              |                | (b) Provide in the abstract an informative and balanced summary of what was done and what was found                                                                                               | Page 2   |
| <b>Introduction</b>          |                |                                                                                                                                                                                                   |          |
| Background/rationale         | 2              | Explain the scientific background and rationale for the investigation being reported                                                                                                              | Page 4-5 |
| Objectives                   | 3              | State specific objectives, including any prespecified hypotheses                                                                                                                                  | Page 5   |
| <b>Methods</b>               |                |                                                                                                                                                                                                   |          |
| Study design                 | 4              | Present key elements of study design early in the paper                                                                                                                                           | Page 5   |
| Setting                      | 5              | Describe the setting, locations, and relevant dates, including periods of recruitment, exposure, follow-up, and data collection                                                                   | Page 5-6 |
| Participants                 | 6              | (a) Give the eligibility criteria, and the sources and methods of selection of participants. Describe methods of follow-up                                                                        | Page 5-6 |
|                              |                | (b) For matched studies, give matching criteria and number of exposed and unexposed                                                                                                               | N/A      |
| Variables                    | 7              | Clearly define all outcomes, exposures, predictors, potential confounders, and effect modifiers. Give diagnostic criteria, if applicable                                                          | Page 5-6 |
| Data sources/<br>measurement | 8*             | For each variable of interest, give sources of data and details of methods of assessment (measurement). Describe comparability of assessment methods if there is more than one group              | Page 5-6 |
| Bias                         | 9              | Describe any efforts to address potential sources of bias                                                                                                                                         | Page 5-6 |
| Study size                   | 10             | Explain how the study size was arrived at                                                                                                                                                         | Page 5-6 |
| Quantitative<br>variables    | 11             | Explain how quantitative variables were handled in the analyses. If applicable, describe which groupings were chosen and why                                                                      | Page 5-6 |
| Statistical methods          | 12             | (a) Describe all statistical methods, including those used to control for confounding                                                                                                             | Page 5-6 |
|                              |                | (b) Describe any methods used to examine subgroups and interactions                                                                                                                               | Page 5-6 |
|                              |                | (c) Explain how missing data were addressed                                                                                                                                                       | Page 5-6 |
|                              |                | (d) If applicable, explain how loss to follow-up was addressed                                                                                                                                    | N/A      |
|                              |                | (e) Describe any sensitivity analyses                                                                                                                                                             | N/A      |
| <b>Results</b>               |                |                                                                                                                                                                                                   |          |
| Participants                 | 13*            | (a) Report numbers of individuals at each stage of study—eg numbers potentially eligible, examined for eligibility, confirmed eligible, included in the study, completing follow-up, and analysed | Page 7   |

|                          |     |                                                                                                                                                                                                              |              |
|--------------------------|-----|--------------------------------------------------------------------------------------------------------------------------------------------------------------------------------------------------------------|--------------|
|                          |     | (b) Give reasons for non-participation at each stage                                                                                                                                                         | Page 7       |
|                          |     | (c) Consider use of a flow diagram                                                                                                                                                                           | N/A          |
| Descriptive data         | 14* | (a) Give characteristics of study participants (eg demographic, clinical, social) and information on exposures and potential confounders                                                                     | Page 7-8     |
|                          |     | (b) Indicate number of participants with missing data for each variable of interest                                                                                                                          | Page 7 foll. |
|                          |     | (c) Summarise follow-up time (eg, average and total amount)                                                                                                                                                  | N/A          |
| Outcome data             | 15* | Report numbers of outcome events or summary measures over time                                                                                                                                               | N/A          |
| Main results             | 16  | (a) Give unadjusted estimates and, if applicable, confounder-adjusted estimates and their precision (eg, 95% confidence interval). Make clear which confounders were adjusted for and why they were included | Page 7 foll. |
|                          |     | (b) Report category boundaries when continuous variables were categorized                                                                                                                                    | N/A          |
|                          |     | (c) If relevant, consider translating estimates of relative risk into absolute risk for a meaningful time period                                                                                             | N/A          |
| Other analyses           | 17  | Report other analyses done—eg analyses of subgroups and interactions, and sensitivity analyses                                                                                                               | Page 8-11    |
| <b>Discussion</b>        |     |                                                                                                                                                                                                              |              |
| Key results              | 18  | Summarise key results with reference to study objectives                                                                                                                                                     | Page 12-13   |
| Limitations              | 19  | Discuss limitations of the study, taking into account sources of potential bias or imprecision. Discuss both direction and magnitude of any potential bias                                                   | Page 13      |
| Interpretation           | 20  | Give a cautious overall interpretation of results considering objectives, limitations, multiplicity of analyses, results from similar studies, and other relevant evidence                                   | Page 14-15   |
| Generalisability         | 21  | Discuss the generalisability (external validity) of the study results                                                                                                                                        | Page 15      |
| <b>Other information</b> |     |                                                                                                                                                                                                              |              |
| Funding                  | 22  | Give the source of funding and the role of the funders for the present study and, if applicable, for the original study on which the present article is based                                                | Page 16      |

\*Give information separately for exposed and unexposed groups.

**Note:** An Explanation and Elaboration article discusses each checklist item and gives methodological background and published examples of transparent reporting. The STROBE checklist is best used in conjunction with this article (freely available on the Web sites of PLoS Medicine at <http://www.plosmedicine.org/>, Annals of Internal Medicine at <http://www.annals.org/>, and Epidemiology at <http://www.epidem.com/>). Information on the STROBE Initiative is available at <http://www.strobe-statement.org>.
