# Supplementary material for: Combining parenthood with a medical career: questionnaire survey of the UK medical graduates of 2002 covering some influences and experiences
Source: PubMed Central journal article supplement — BMJ Open. 2017 Aug 23;7(8):e016822. doi: 10.1136/bmjopen-2017-016822 (PMC5629622; doi:10.1136/bmjopen-2017-016822), 2017-08-23
Supplement: bmjopen-2017-016822supp001.pdf [file bmjopen-2017-016822supp001.pdf]

**Appendix 1: Odds ratios and confidence intervals for the multivariable models on effect of having children and on family-friendliness (a, b and c, see footnotes)**

| Group                         | a               |       |                | b     |                 | c     |  |
|-------------------------------|-----------------|-------|----------------|-------|-----------------|-------|--|
|                               | OR (95% CI)     | p     | OR (95% CI)    | p     | OR (95% CI)     | p     |  |
| <b>Gender</b>                 |                 |       |                |       |                 |       |  |
| Male*                         | 1               |       | 1              |       | -               | NS    |  |
| Female                        | 2.9 (2.2, 3.8)  | <.001 | -              | NS    | -               | NS    |  |
| <b>Has child(ren)</b>         |                 |       |                |       |                 |       |  |
| Yes*                          | 1               |       | 1              |       | -               | NS    |  |
| No                            | 0.3 (0.2, 0.4)  | <.001 | 0.6 (0.5, 0.8) | <.001 | -               | NS    |  |
| <b>Specialty group</b>        |                 |       |                |       |                 |       |  |
| Hospital medical specialties* | 1               |       | -              | NS    | 1               |       |  |
| Surgery                       | 0.9 (0.6, 1.4)  | 0.67  | -              | NS    | 0.5 (0.3, 0.7)  | <.001 |  |
| GP                            | 8.1 (5.8, 11.5) | <.001 | -              | NS    | 2.8 (2.1, 3.7)  | <.001 |  |
| Paediatrics                   | 0.8 (0.5, 1.3)  | 0.29  | -              | NS    | 1.4 (0.9, 2.2)  | 0.12  |  |
| Emergency medicine            | 0.6 (0.3, 1.4)  | 0.23  | -              | NS    | 0.4 (0.2, 0.8)  | 0.01  |  |
| Obstetrics and gynaecology    | 0.2 (0.1, 0.7)  | 0.01  | -              | NS    | 0.4 (0.2, 0.9)  | 0.02  |  |
| Anaesthesia                   | 1.5 (0.9, 2.3)  | 0.1   | -              | NS    | 1.8 (1.2, 2.7)  | 0.002 |  |
| Radiology                     | 5.6 (2.9, 10.8) | <.001 | -              | NS    | 6.4 (2.8, 14.6) | <.001 |  |
| Clinical oncology             | 2.0 (0.8, 4.6)  | 0.12  | -              | NS    | 2.2 (1, 5)      | 0.06  |  |
| Pathology                     | 2.6 (1.4, 4.7)  | 0.002 | -              | NS    | 4 (2, 7.7)      | <.001 |  |
| Psychiatry                    | 1.4 (0.8, 2.5)  | 0.27  | -              | NS    | 6.1 (2.9, 12.8) | <.001 |  |
| <b>Partner/spouse status</b>  |                 |       |                |       |                 |       |  |
| Medical spouse*               | -               | NS    | -              | NS    | -               | NS    |  |
| Non-medical spouse            | -               | NS    | -              | NS    | -               | NS    |  |
| No spouse                     | -               | NS    | -              | NS    | -               | NS    |  |
| <b>Working hours</b>          |                 |       |                |       |                 |       |  |
| Full time*                    | 1               |       | 1              |       | 1               |       |  |
| Less than full time           | 1.9 (1.4, 2.5)  | <.001 | 1.2 (1.0, 1.6) | <.05  | 2.2 (1.7, 2.9)  | <.001 |  |

Multivariable model based on numbers of doctors who replied 'yes' to a) Has the fact of having children, or of wanting to have children, influenced your choice of career specialty?; b) Do you regard the NHS as a family-friendly employer for doctors with children?; c) Do you regard your specialty as a family-friendly employer for doctors with children?

\*Reference group for multivariable model.

'Multivariable' denotes binomial logistic regression result for each predictor with all other predictors in the model. We excluded cases where one or more predictors were missing, or where the dependent variable was missing, which reduced the sample size to 1716.

The Odds Ratios (OR) indicate the likelihood that a member of a group would regard the outcome variable as important, compared with a member of the reference group. Thus, for example, compared with a full-time doctor, a part-time doctor was twice as likely to regard children as an important influence on their choice of specialty.

## Appendix 2: Numbers and percentages of respondents answering yes to the questions on family-friendliness<sup>ab</sup>

| Respondent group          | Total     |           | Have children |           | No children |           |
|---------------------------|-----------|-----------|---------------|-----------|-------------|-----------|
|                           | Male      | Female    | Male          | Female    | Male        | Female    |
| Total <sup>a</sup>        | 39% (283) | 43% (475) | 40% (190)     | 50% (348) | 37% (93)    | 32% (127) |
| Total <sup>b</sup>        | 57% (399) | 69% (724) | 57% (263)     | 76% (509) | 55% (136)   | 57% (215) |
| Medical specialties       | 43% (65)  | 60% (105) | 36% (33)      | 67% (67)  | 52% (32)    | 51% (38)  |
| Surgery                   | 32% (45)  | 32% (20)  | 35% (29)      | 46% (12)  | 29% (16)    | 22% (8)   |
| GP                        | 79% (136) | 78% (351) | 81% (97)      | 82% (271) | 75% (39)    | 67% (80)  |
| Other hospital:           | 63% (153) | 68% (248) | 64% (104)     | 74% (159) | 63% (49)    | 60% (89)  |
| <i>Paediatrics</i>        | 54% (14)  | 66% (63)  | 47% (9)       | 73% (43)  | 71% (5)     | 54% (20)  |
| <i>Emergency medicine</i> | 27% (8)   | 39% (9)   | 25% (5)       | 25% (3)   | 30% (3)     | 55% (6)   |
| <i>Anaesthesia</i>        | 59% (48)  | 71% (59)  | 62% (37)      | 74% (31)  | 50% (11)    | 68% (28)  |
| <i>Radiology</i>          | 92% (22)  | 77% (24)  | 100% (15)     | 95% (20)  | 78% (7)     | 40% (4)   |
| <i>Clinical Oncology</i>  | 80% (8)   | 63% (12)  | 71% (5)       | 67% (6)   | 100% (3)    | 60% (6)   |
| <i>Pathology</i>          | 90% (26)  | 74% (26)  | 86% (18)      | 83% (19)  | 100% (8)    | 58% (7)   |
| <i>Psychiatry</i>         | 87% (26)  | 88% (44)  | 94% (15)      | 91% (29)  | 79% (11)    | 83% (15)  |

<sup>a</sup> Question wording: 'Do you regard the NHS as a family-friendly employer for doctors with children?'

<sup>b</sup> Question wording: 'Do you regard your specialty as a family-friendly employer for doctors with children?' (and all lines below Total<sup>b</sup>)
